# Supplementary material
Source: PubMed Central journal article supplement (PMC9886402)

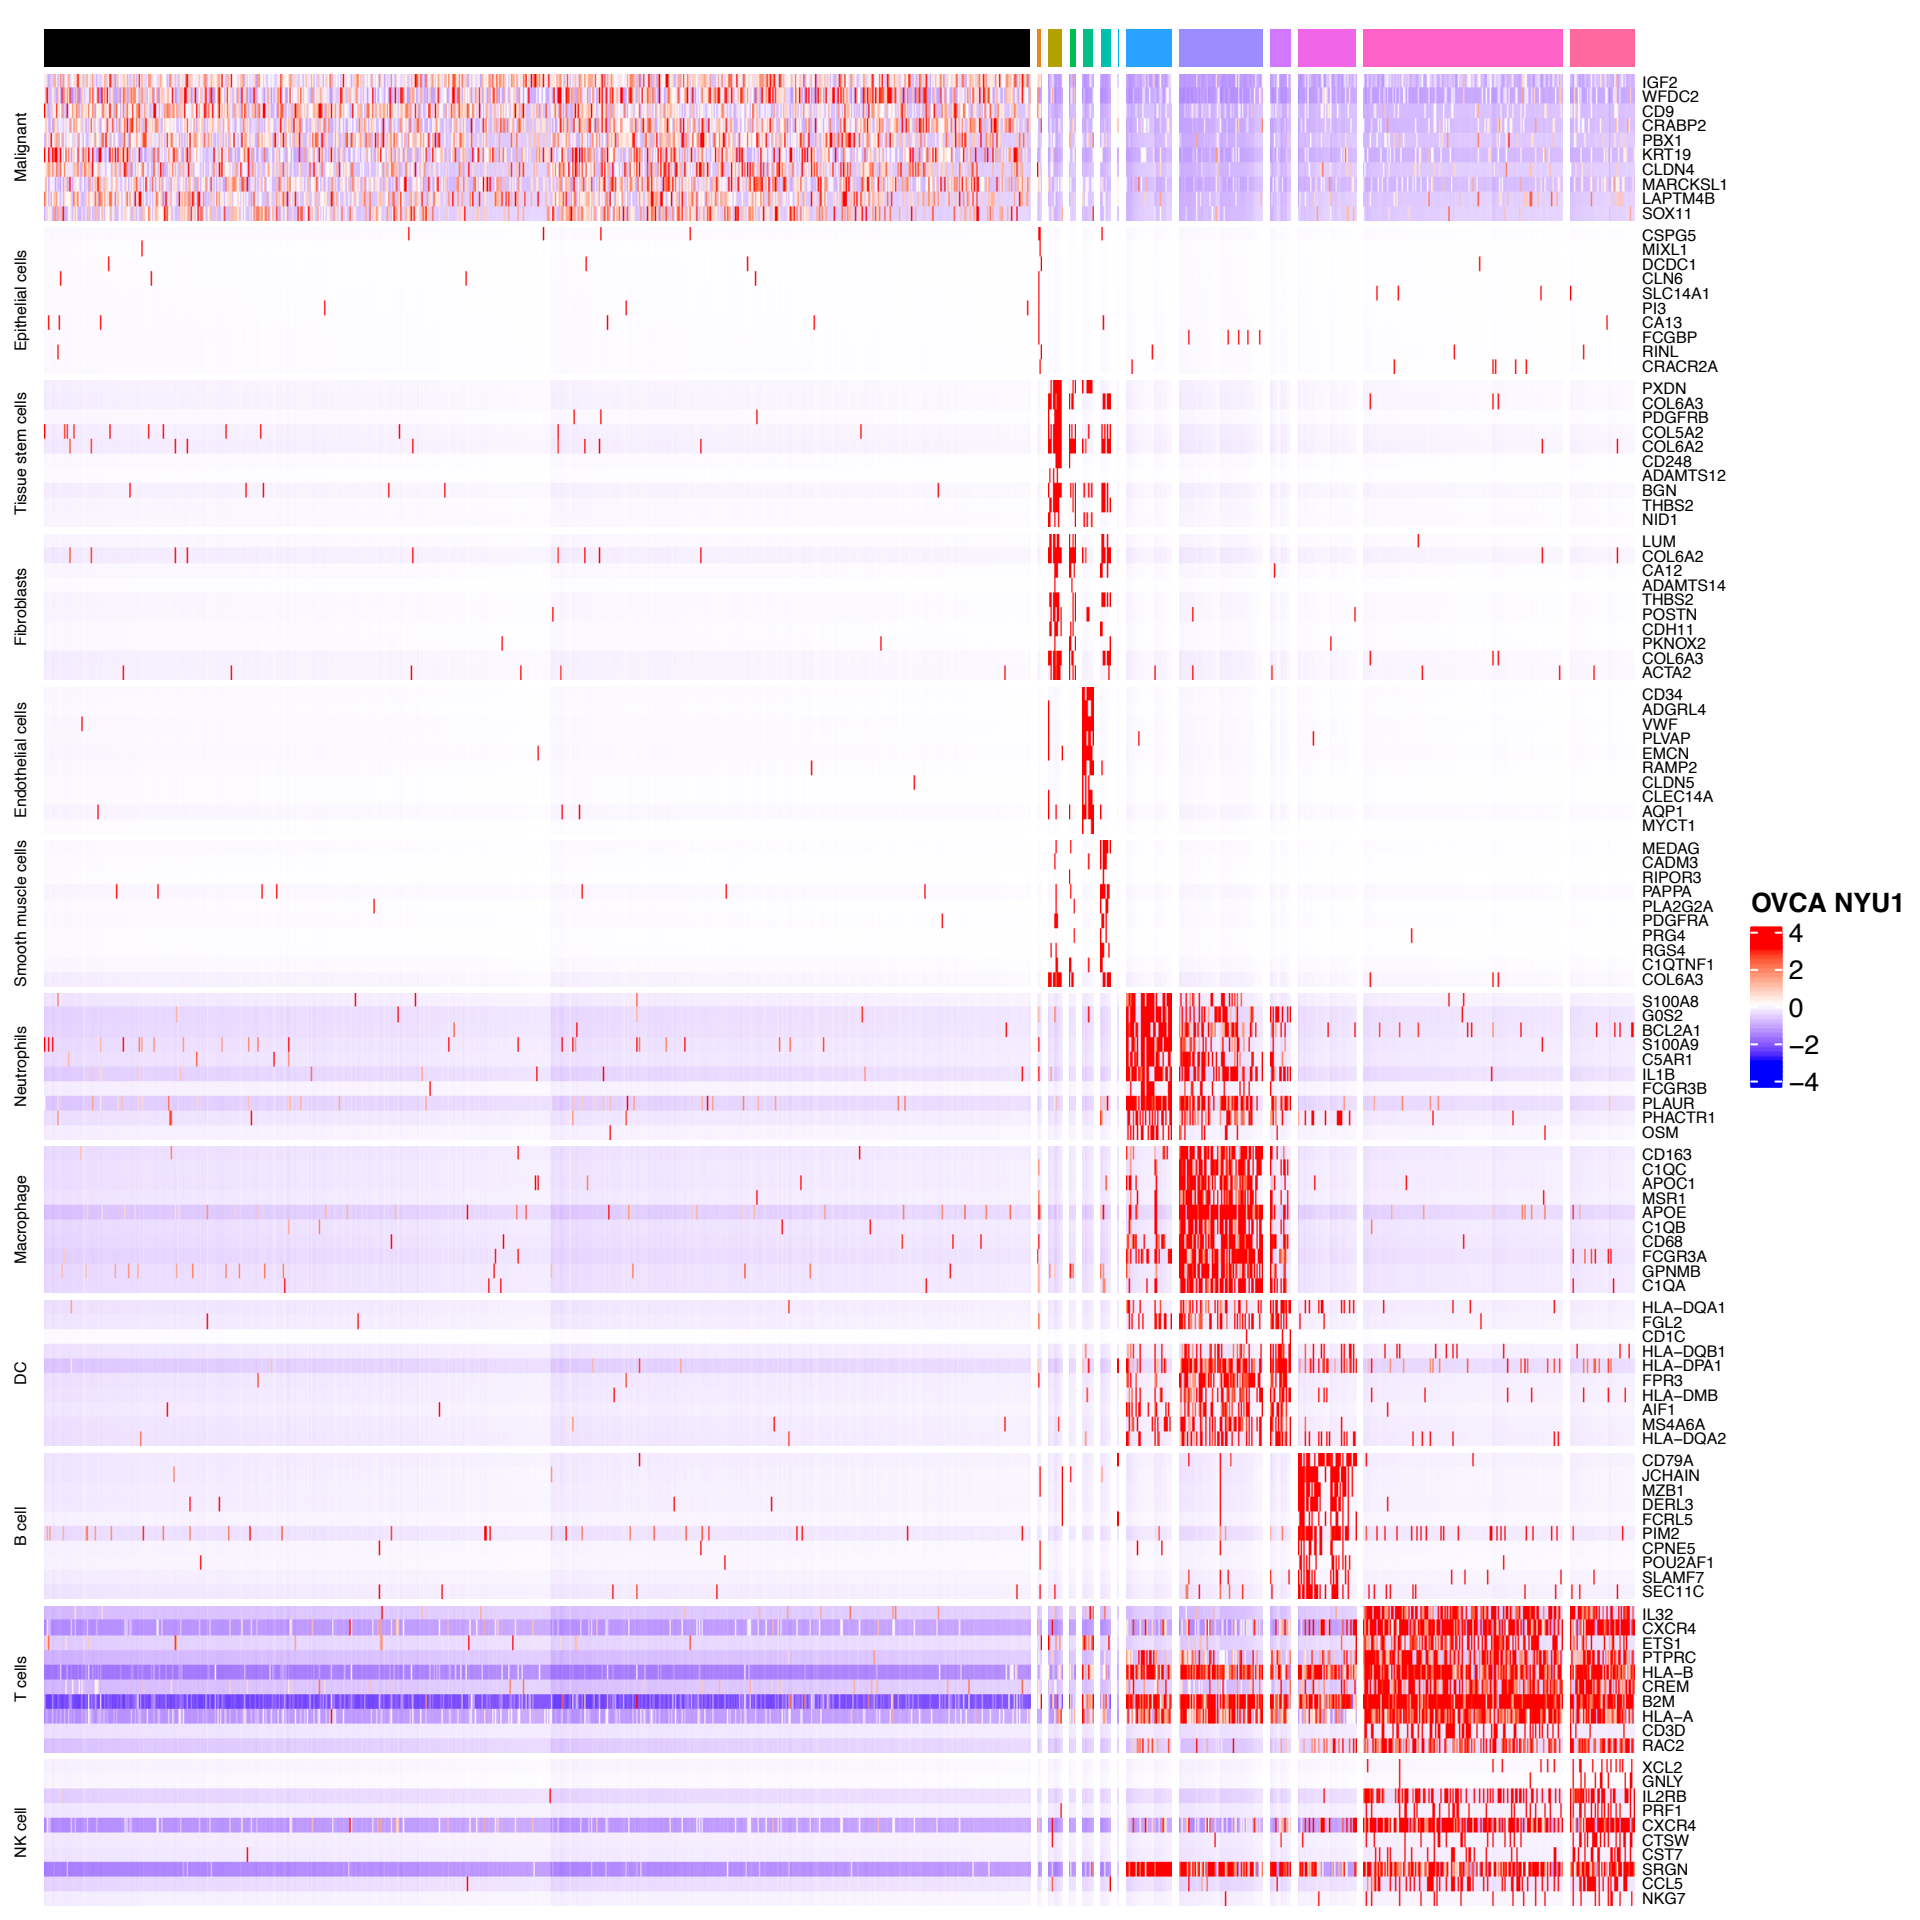

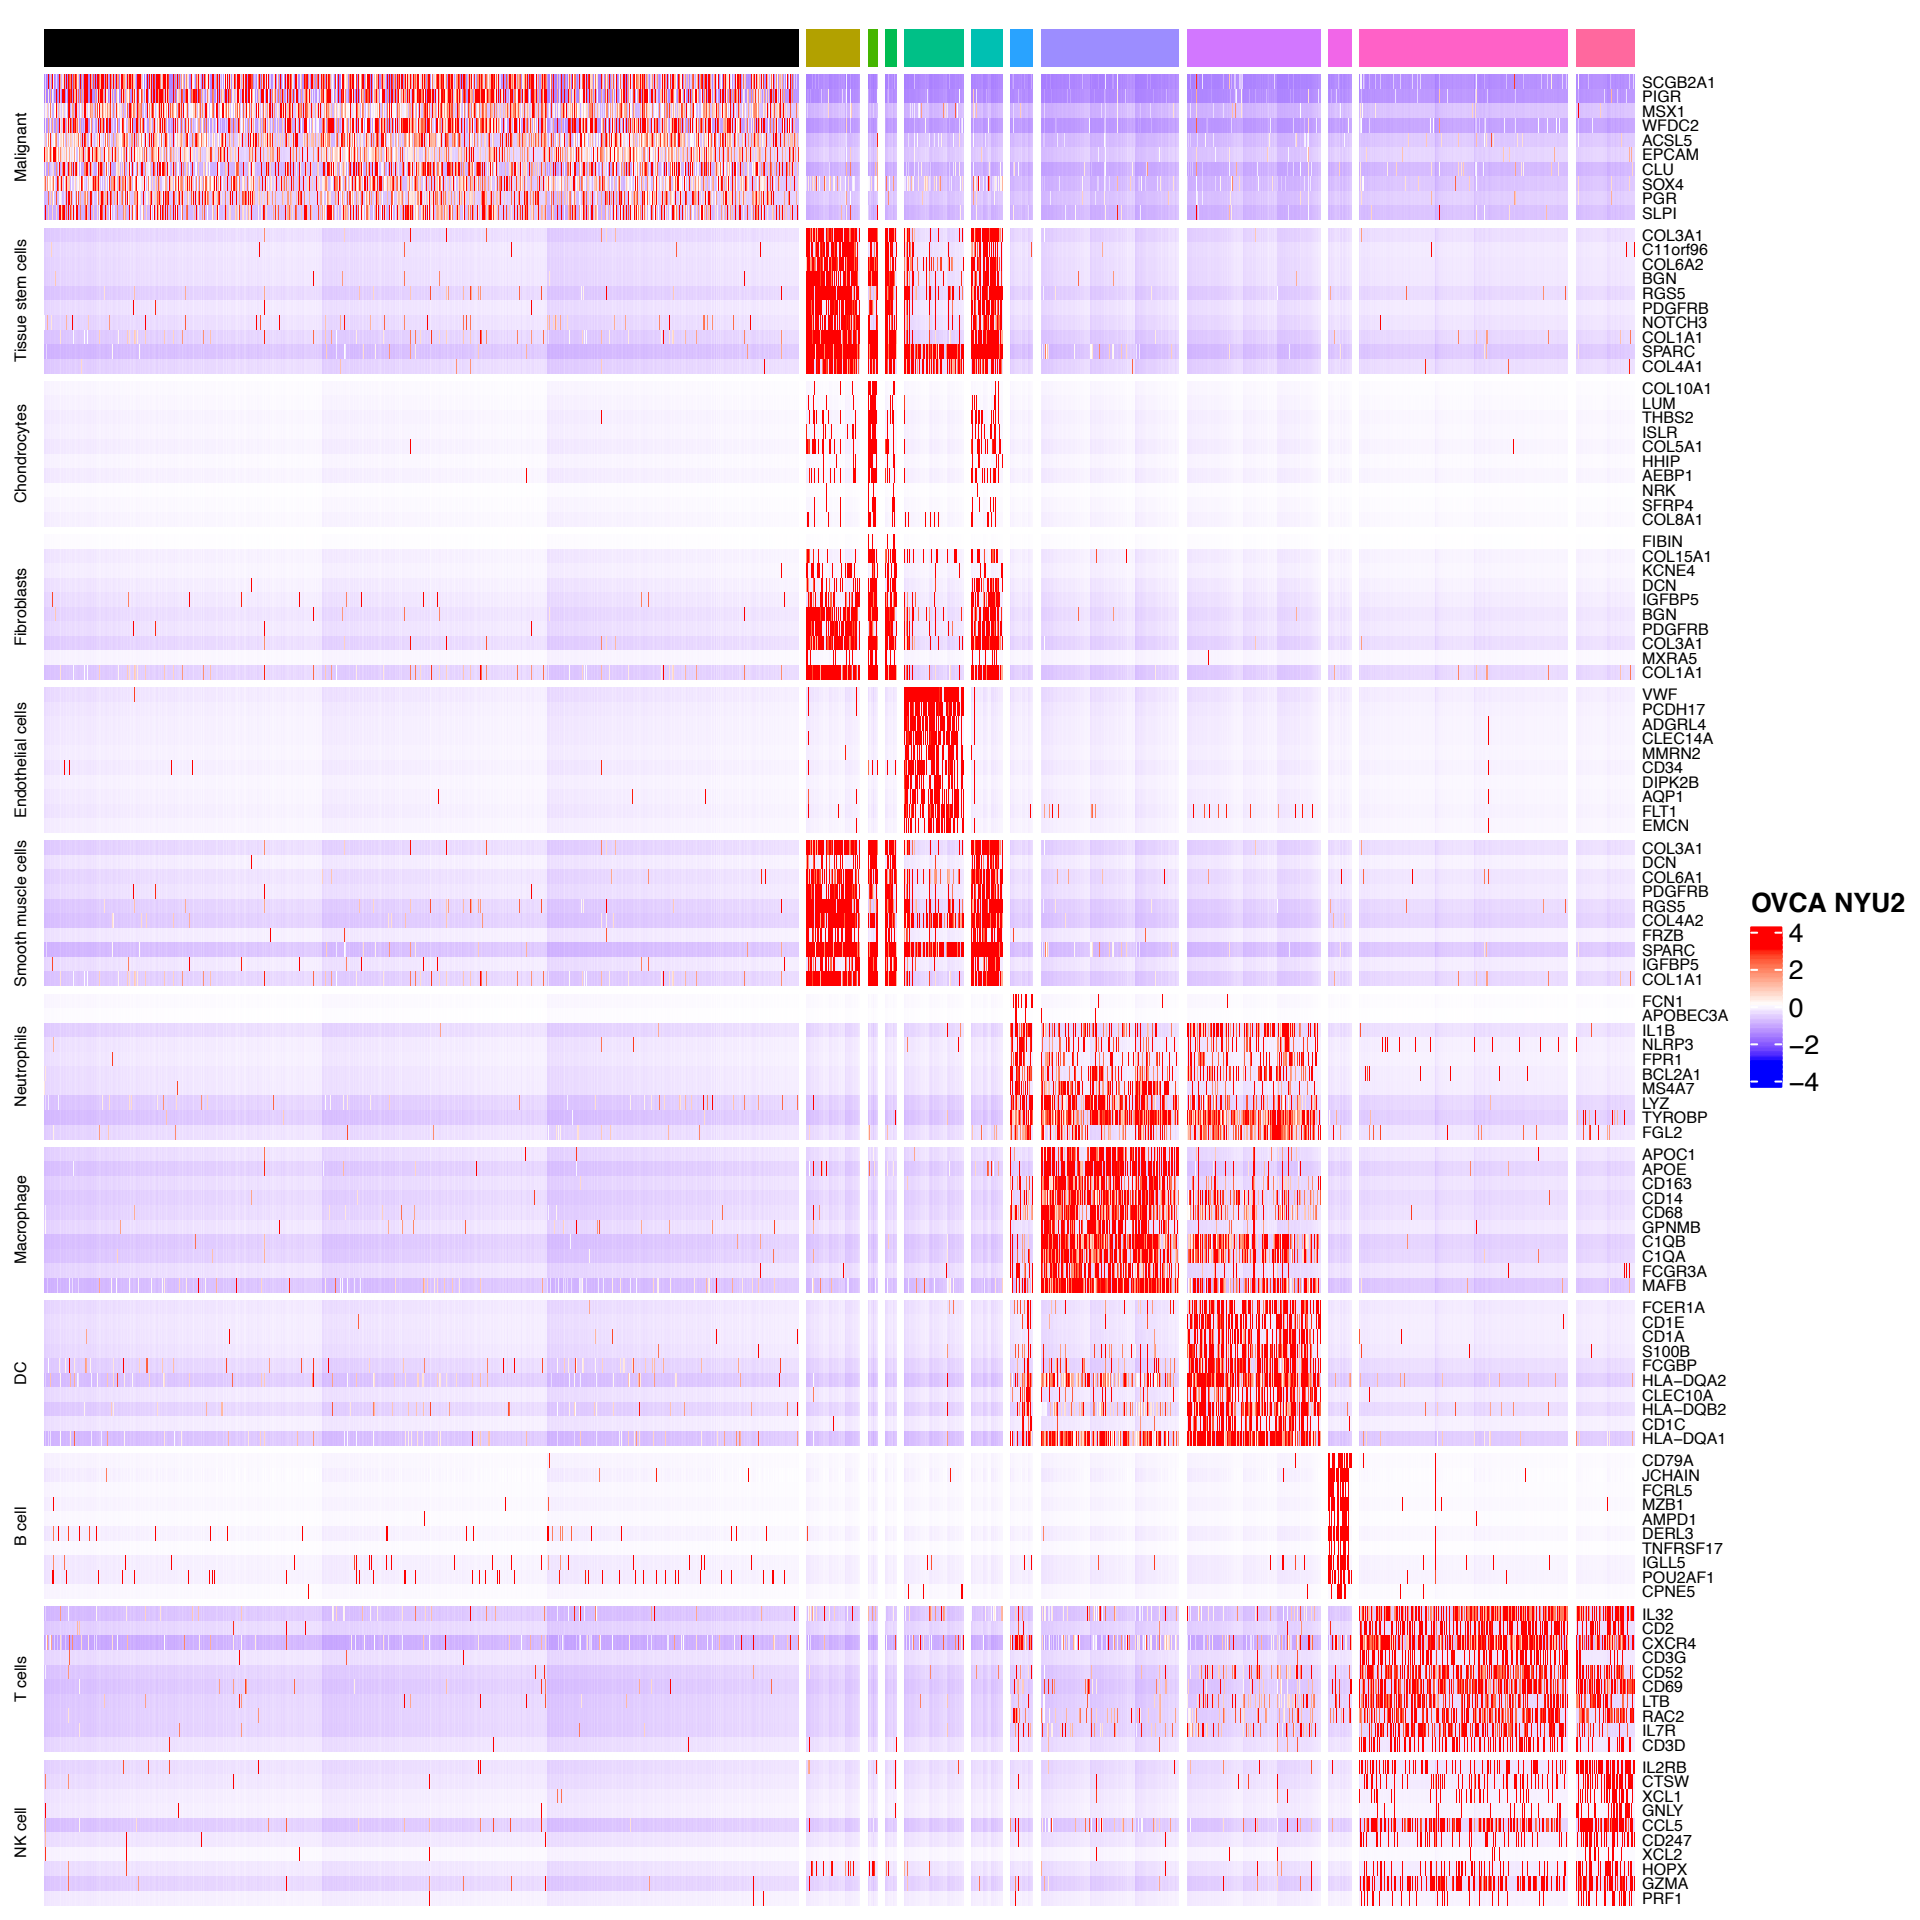

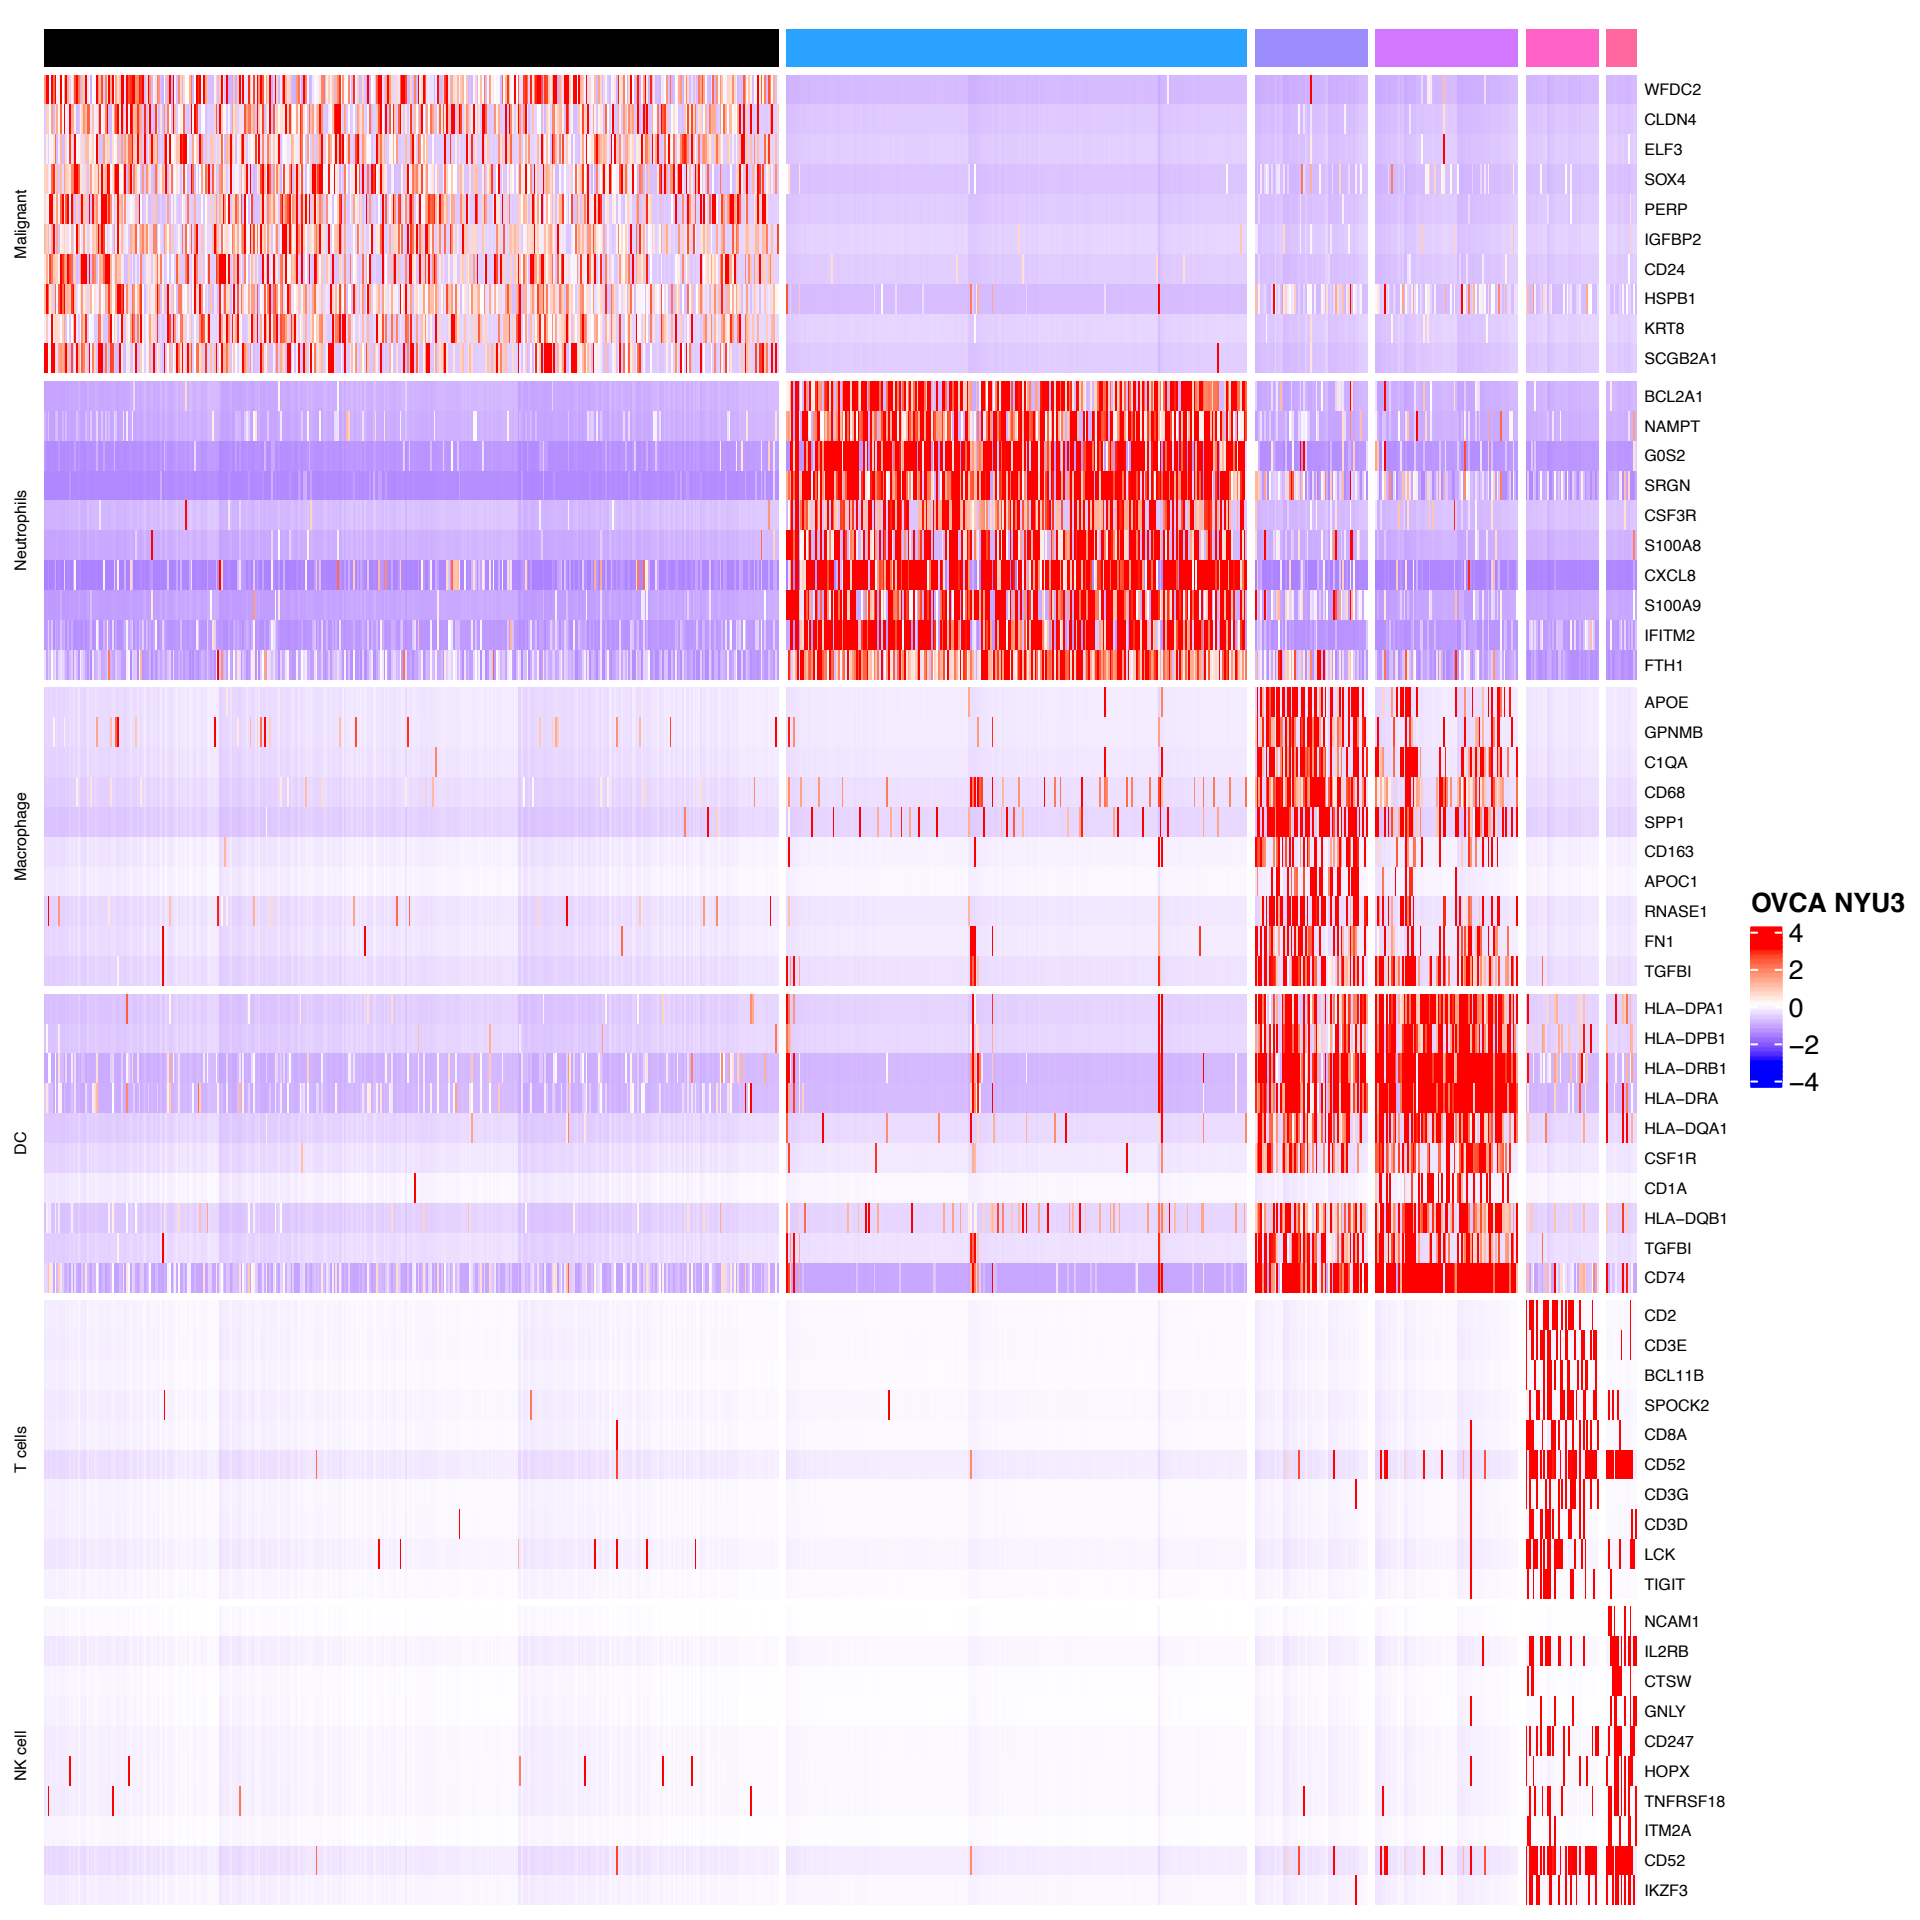

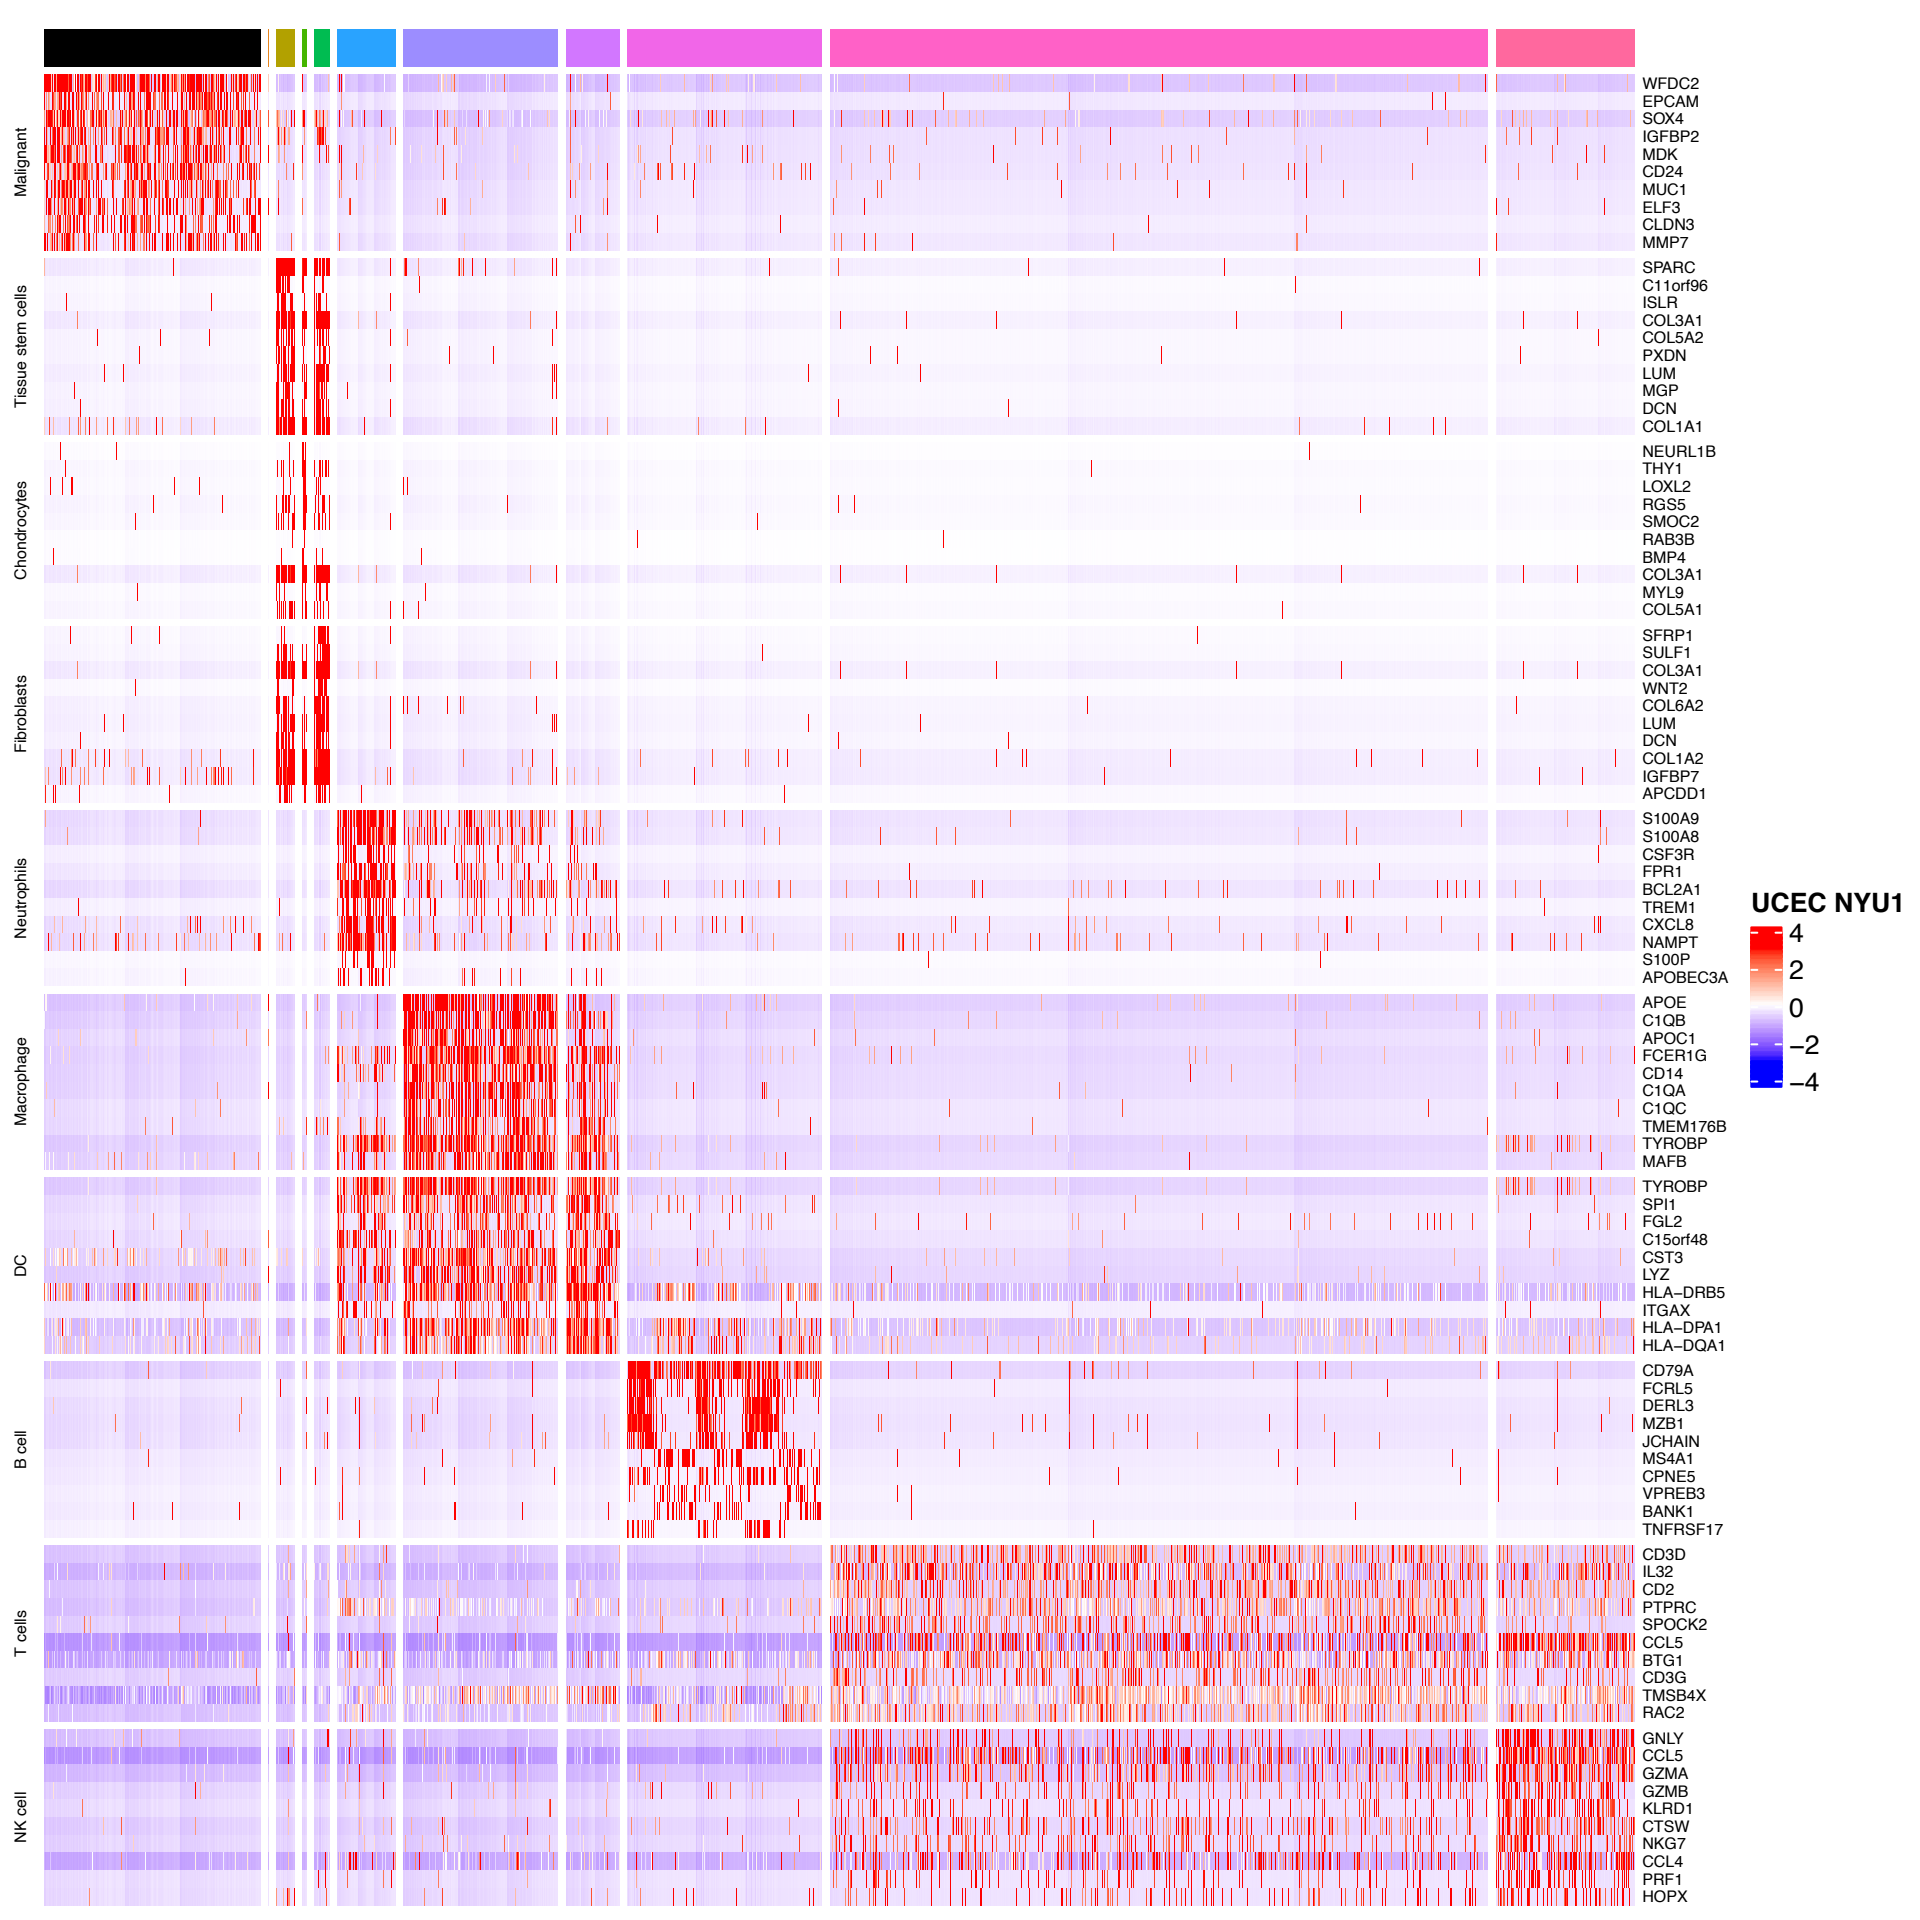



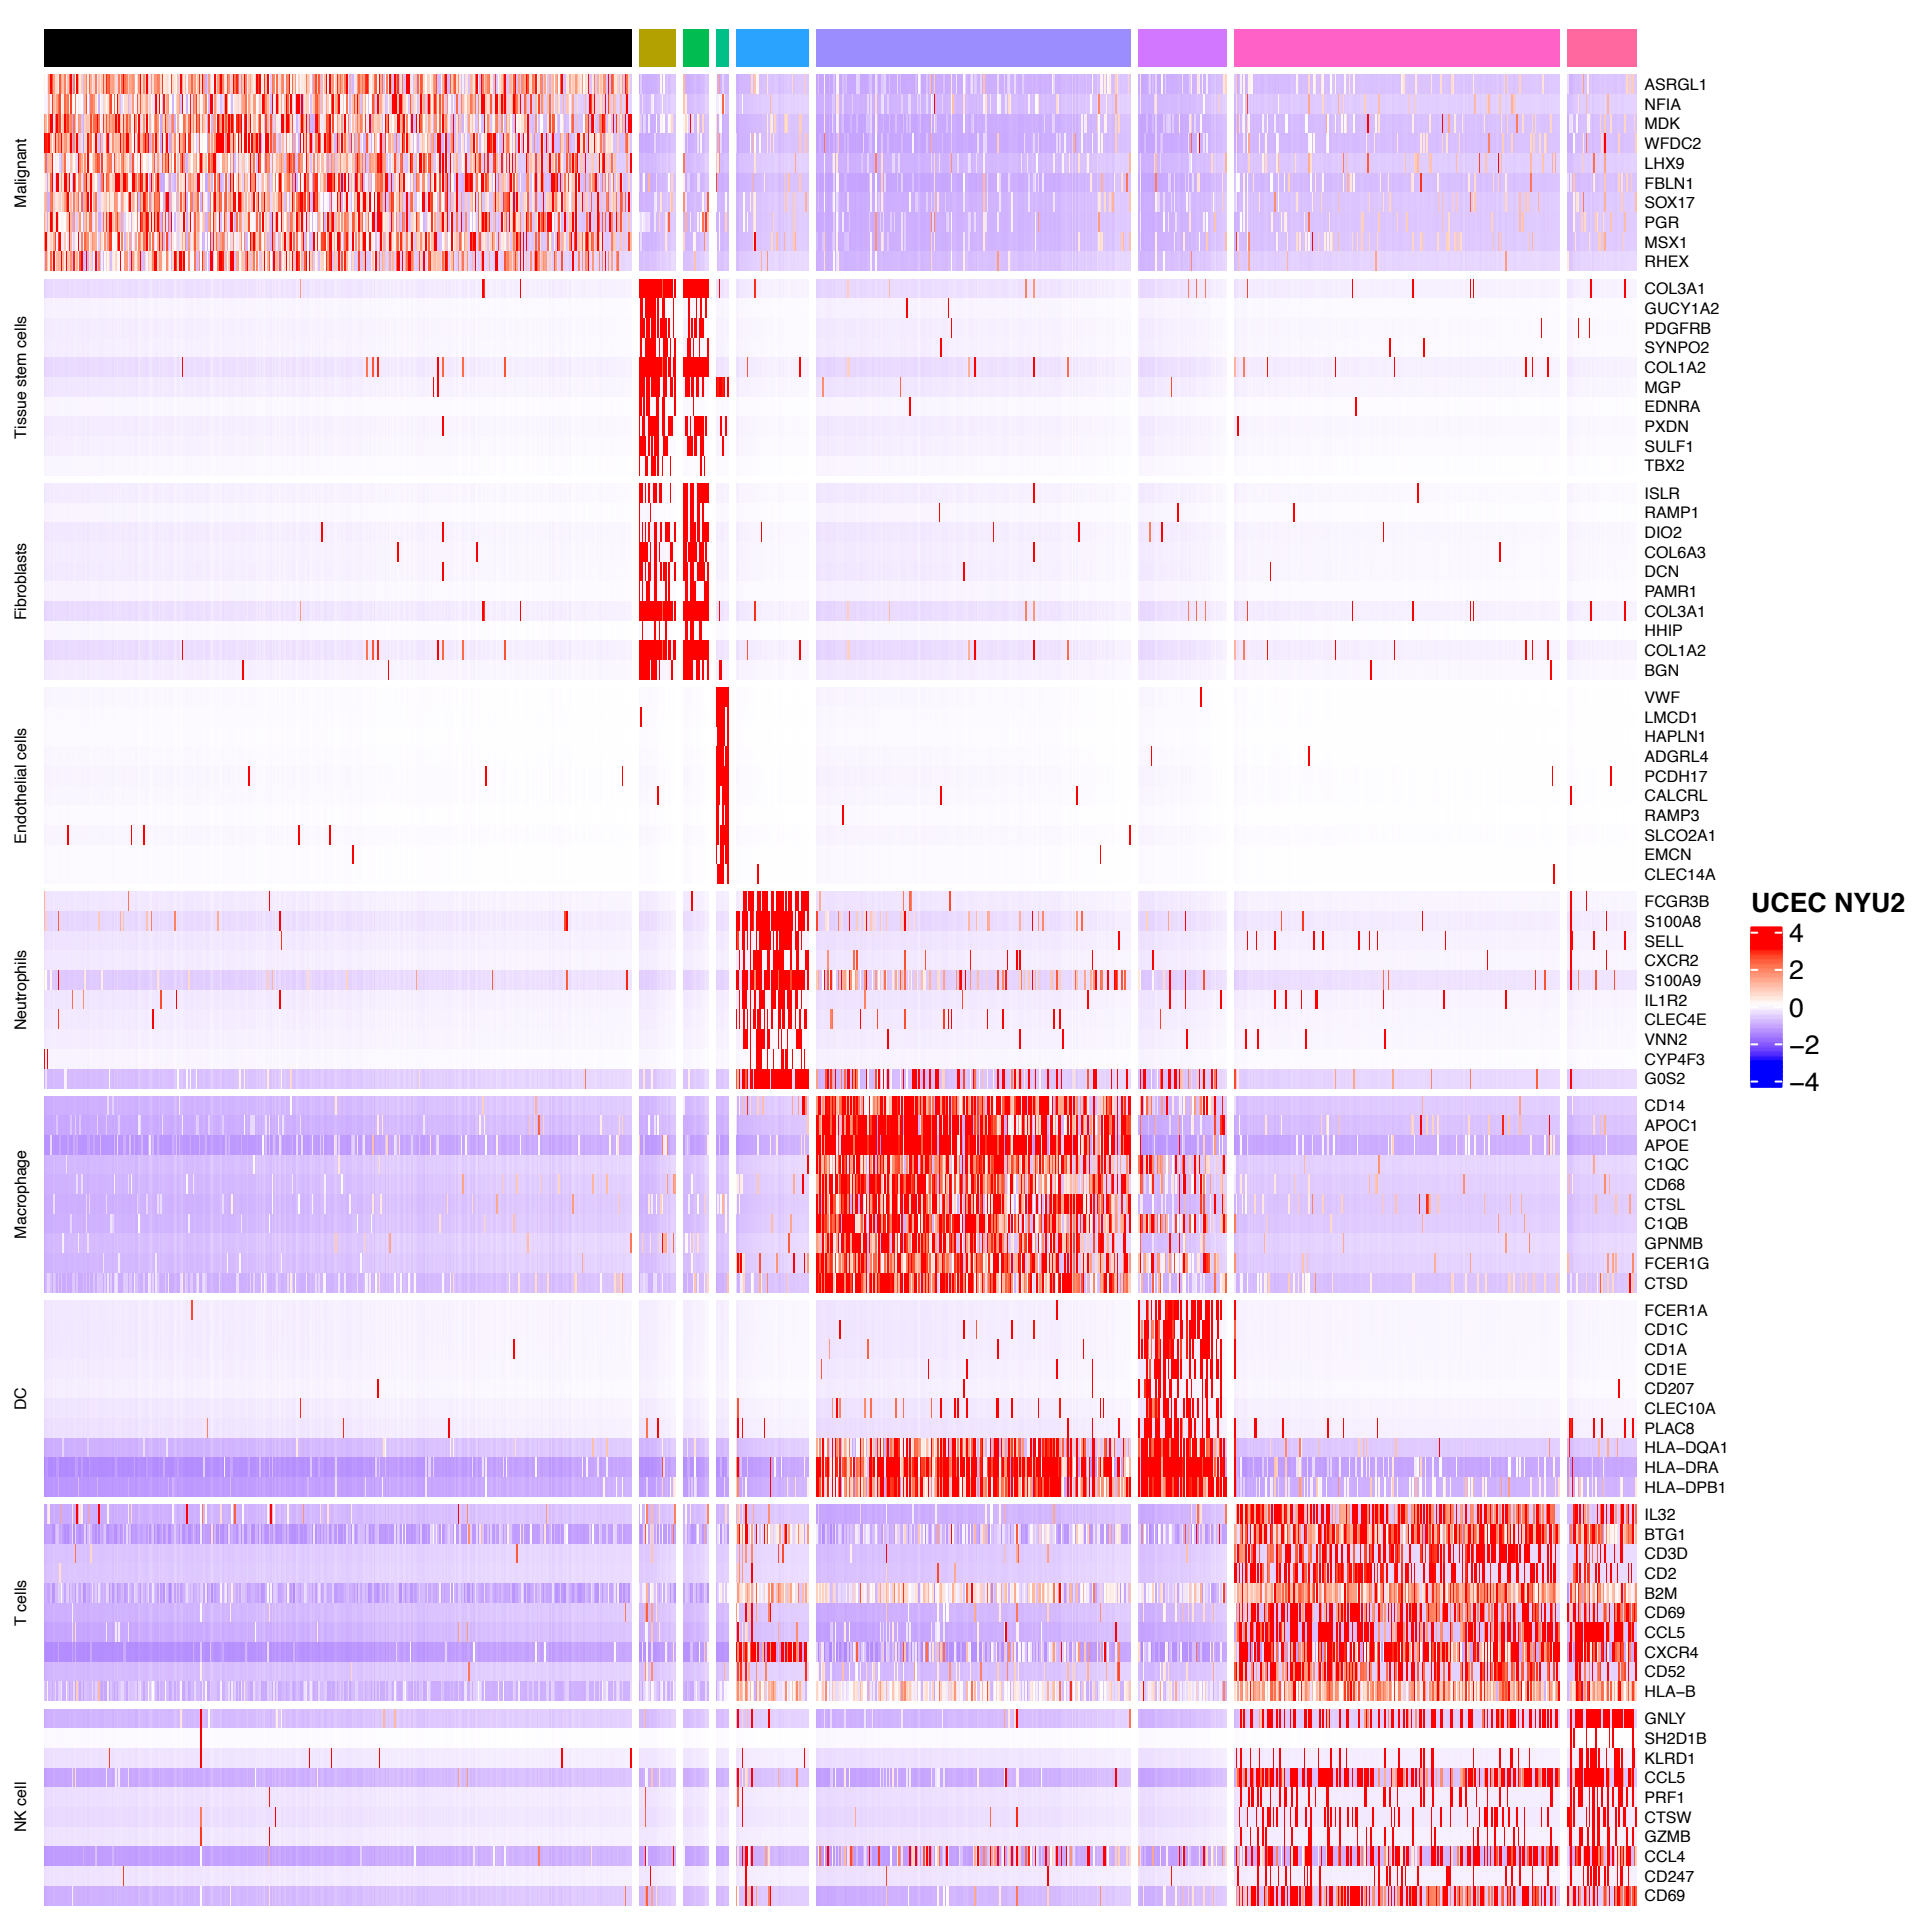

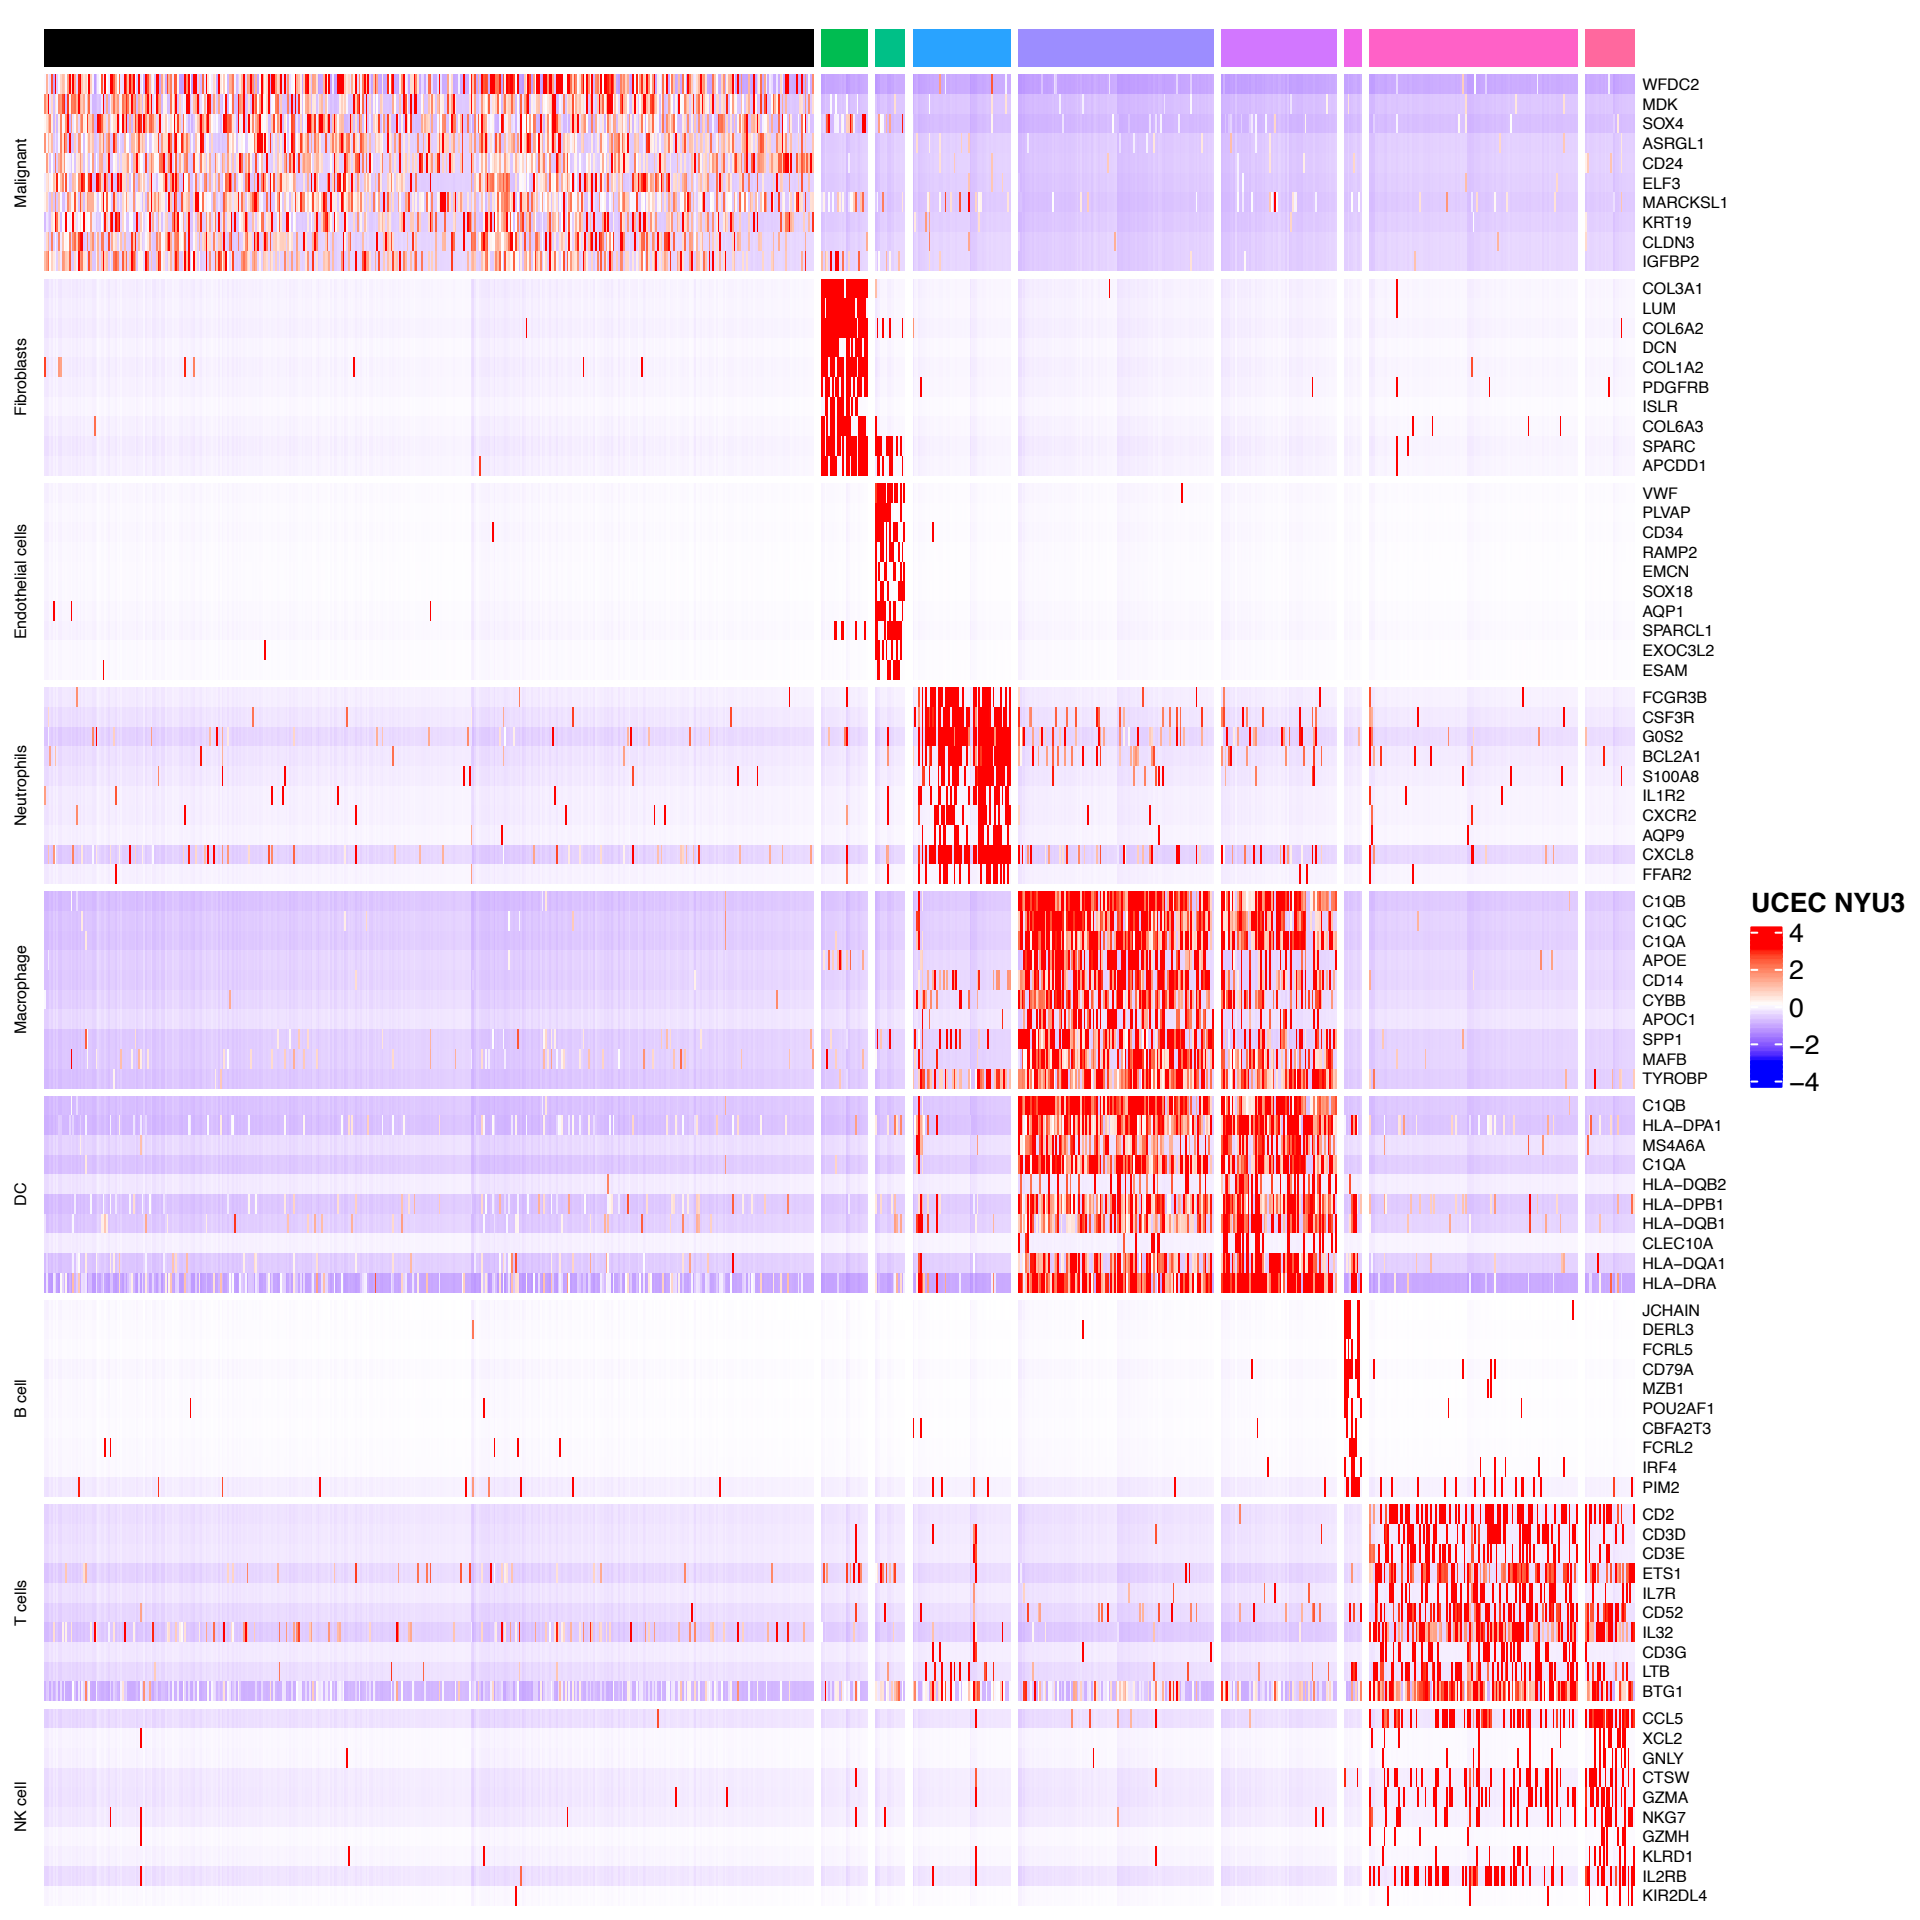

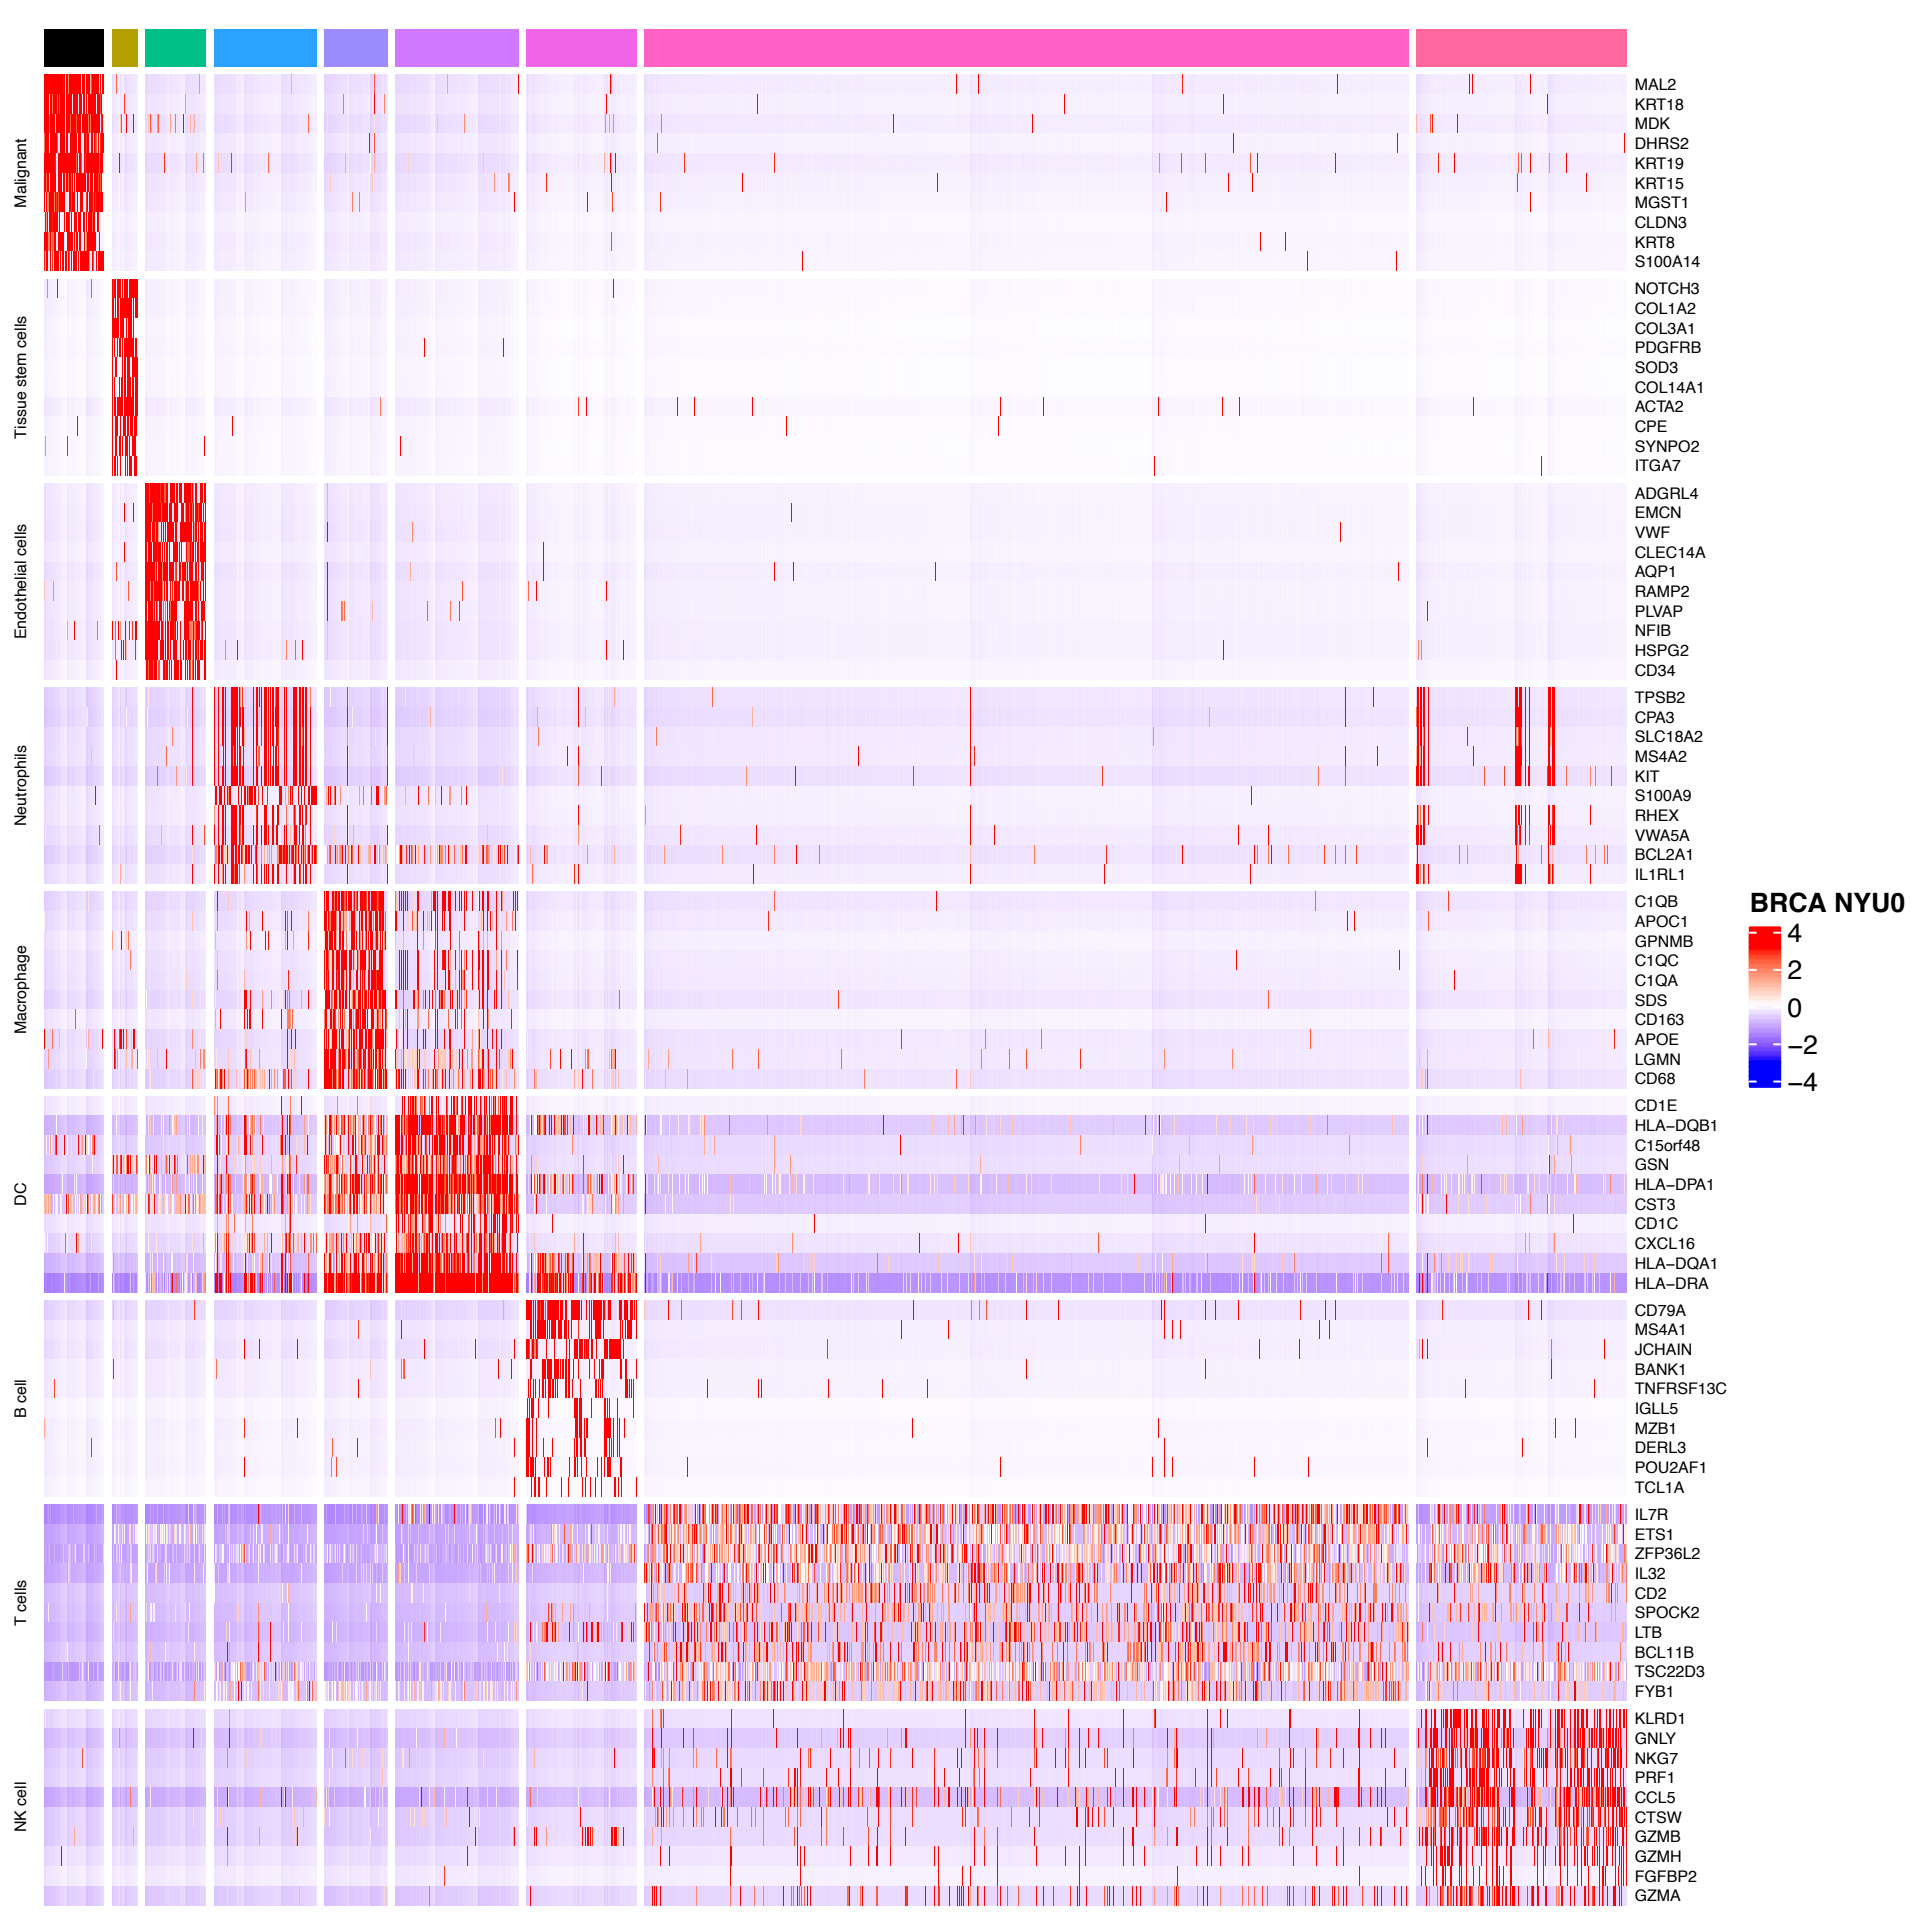

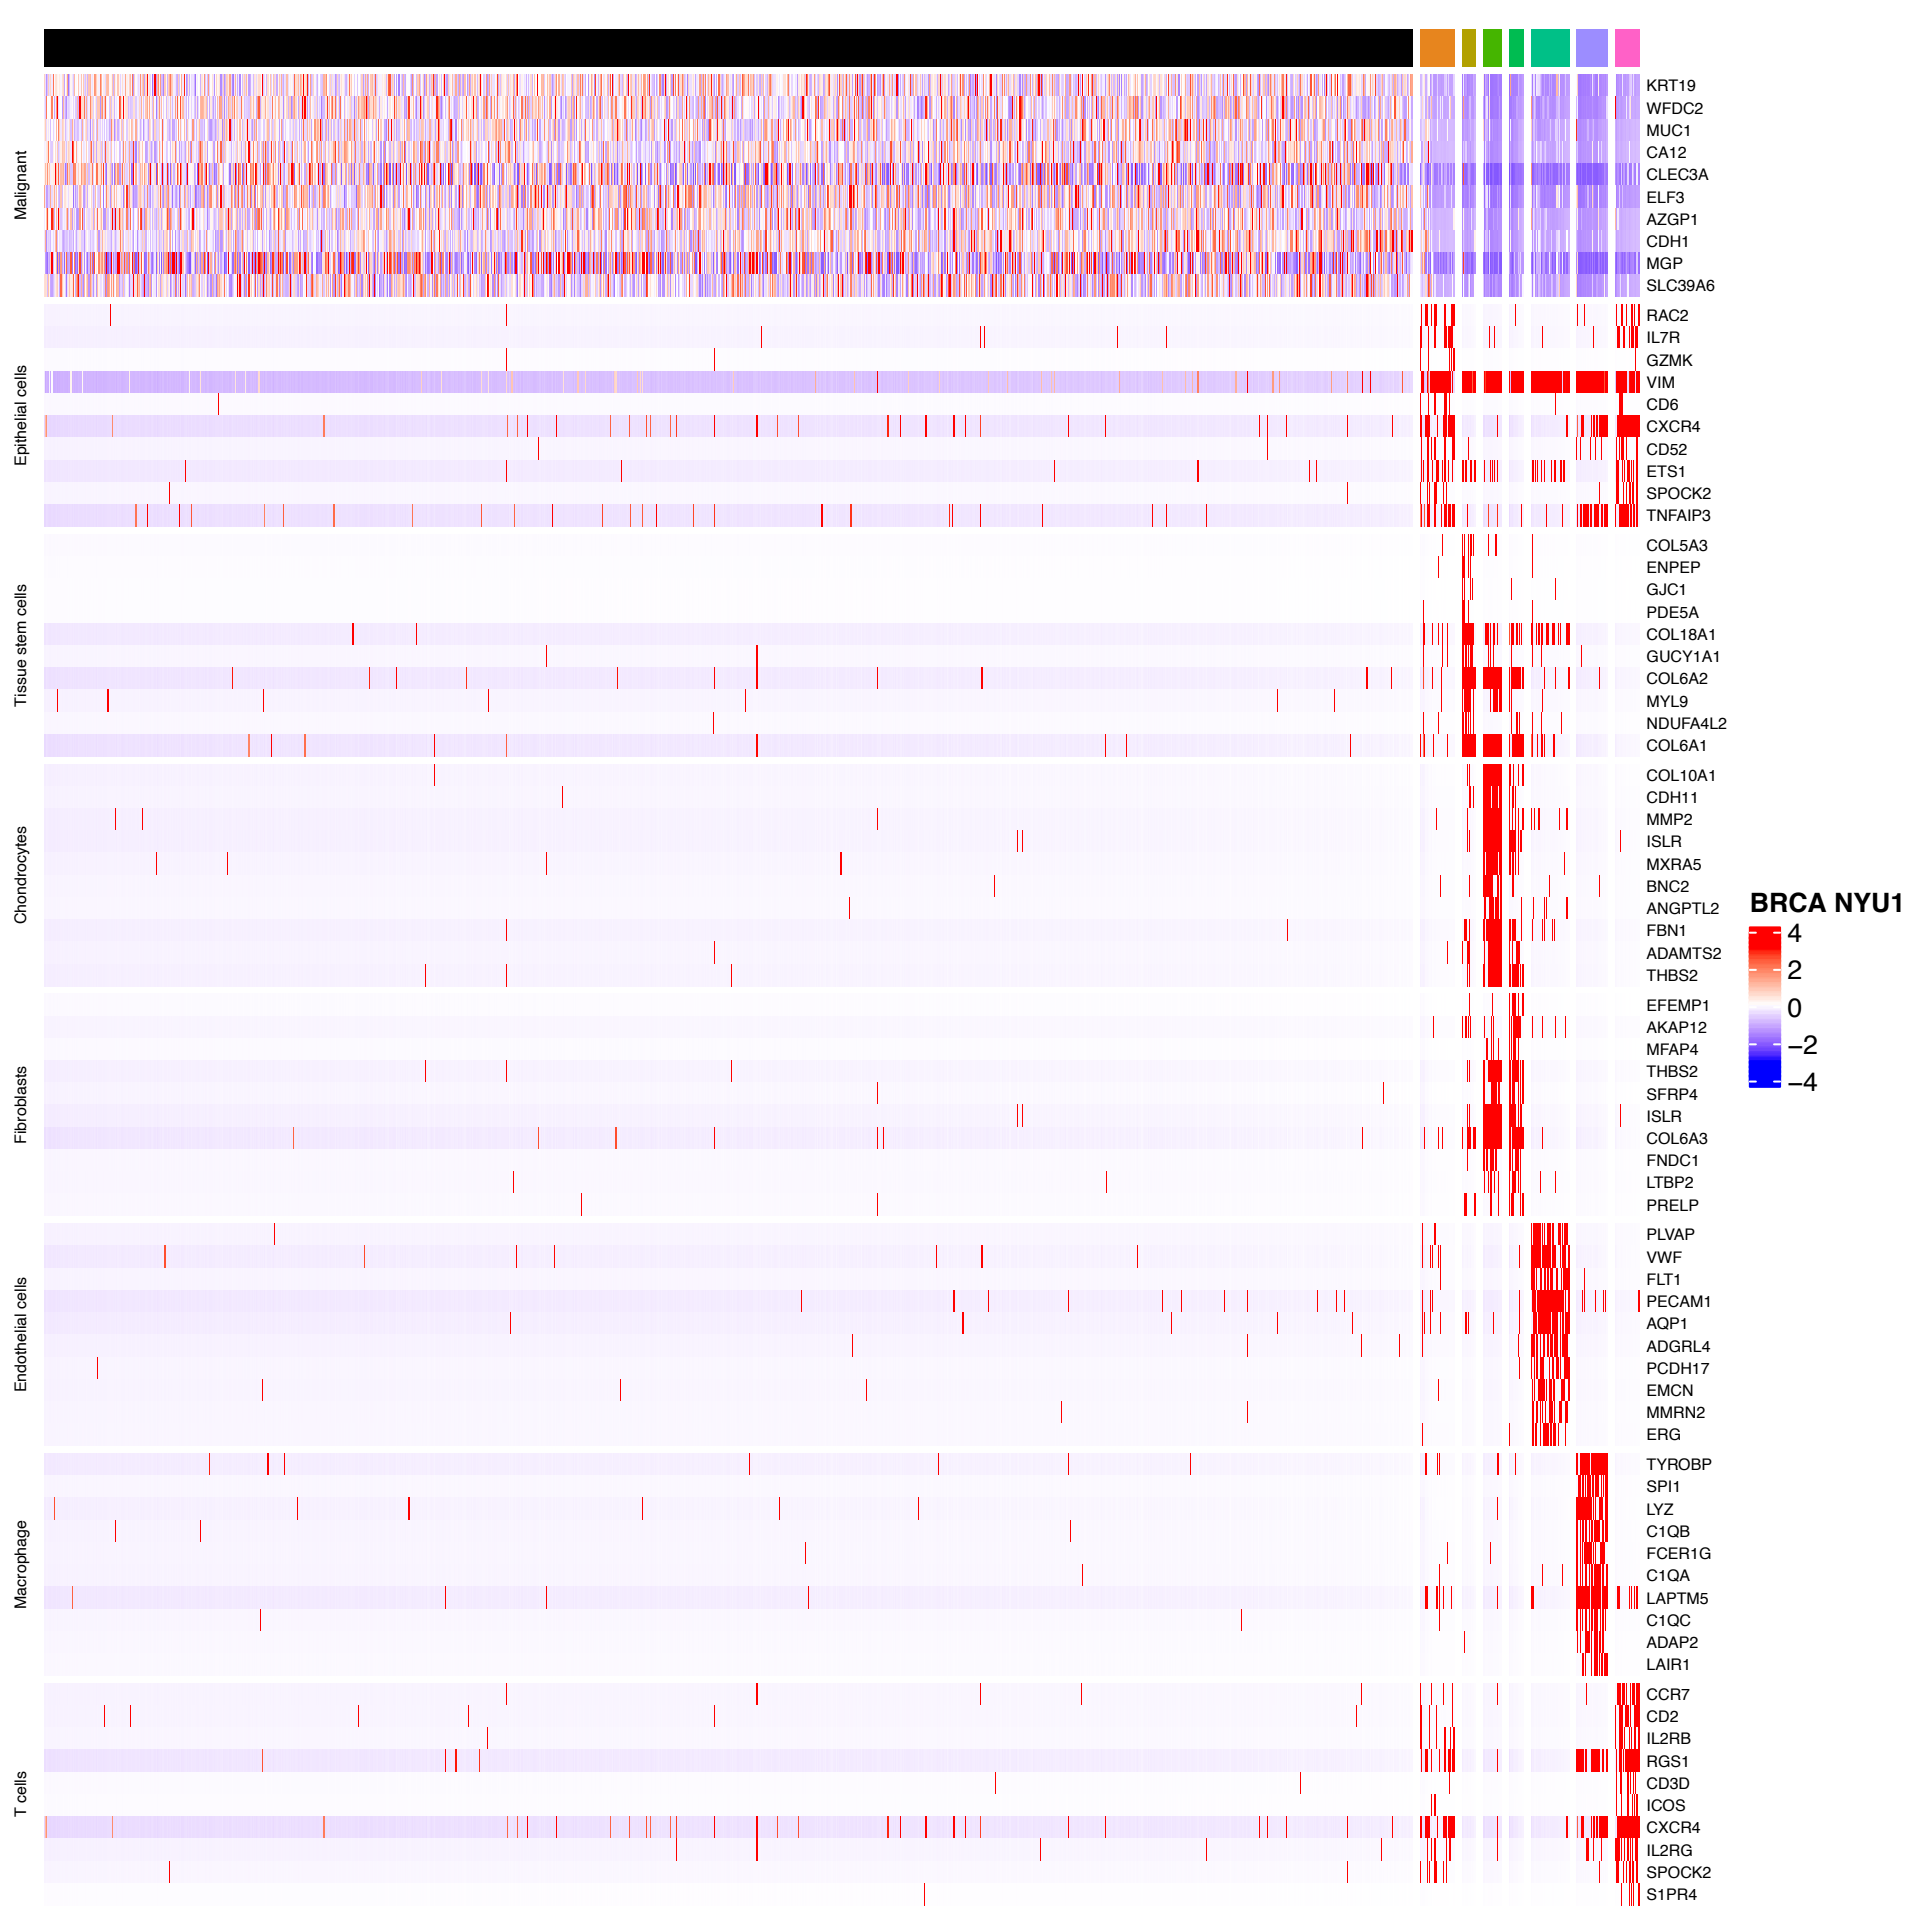

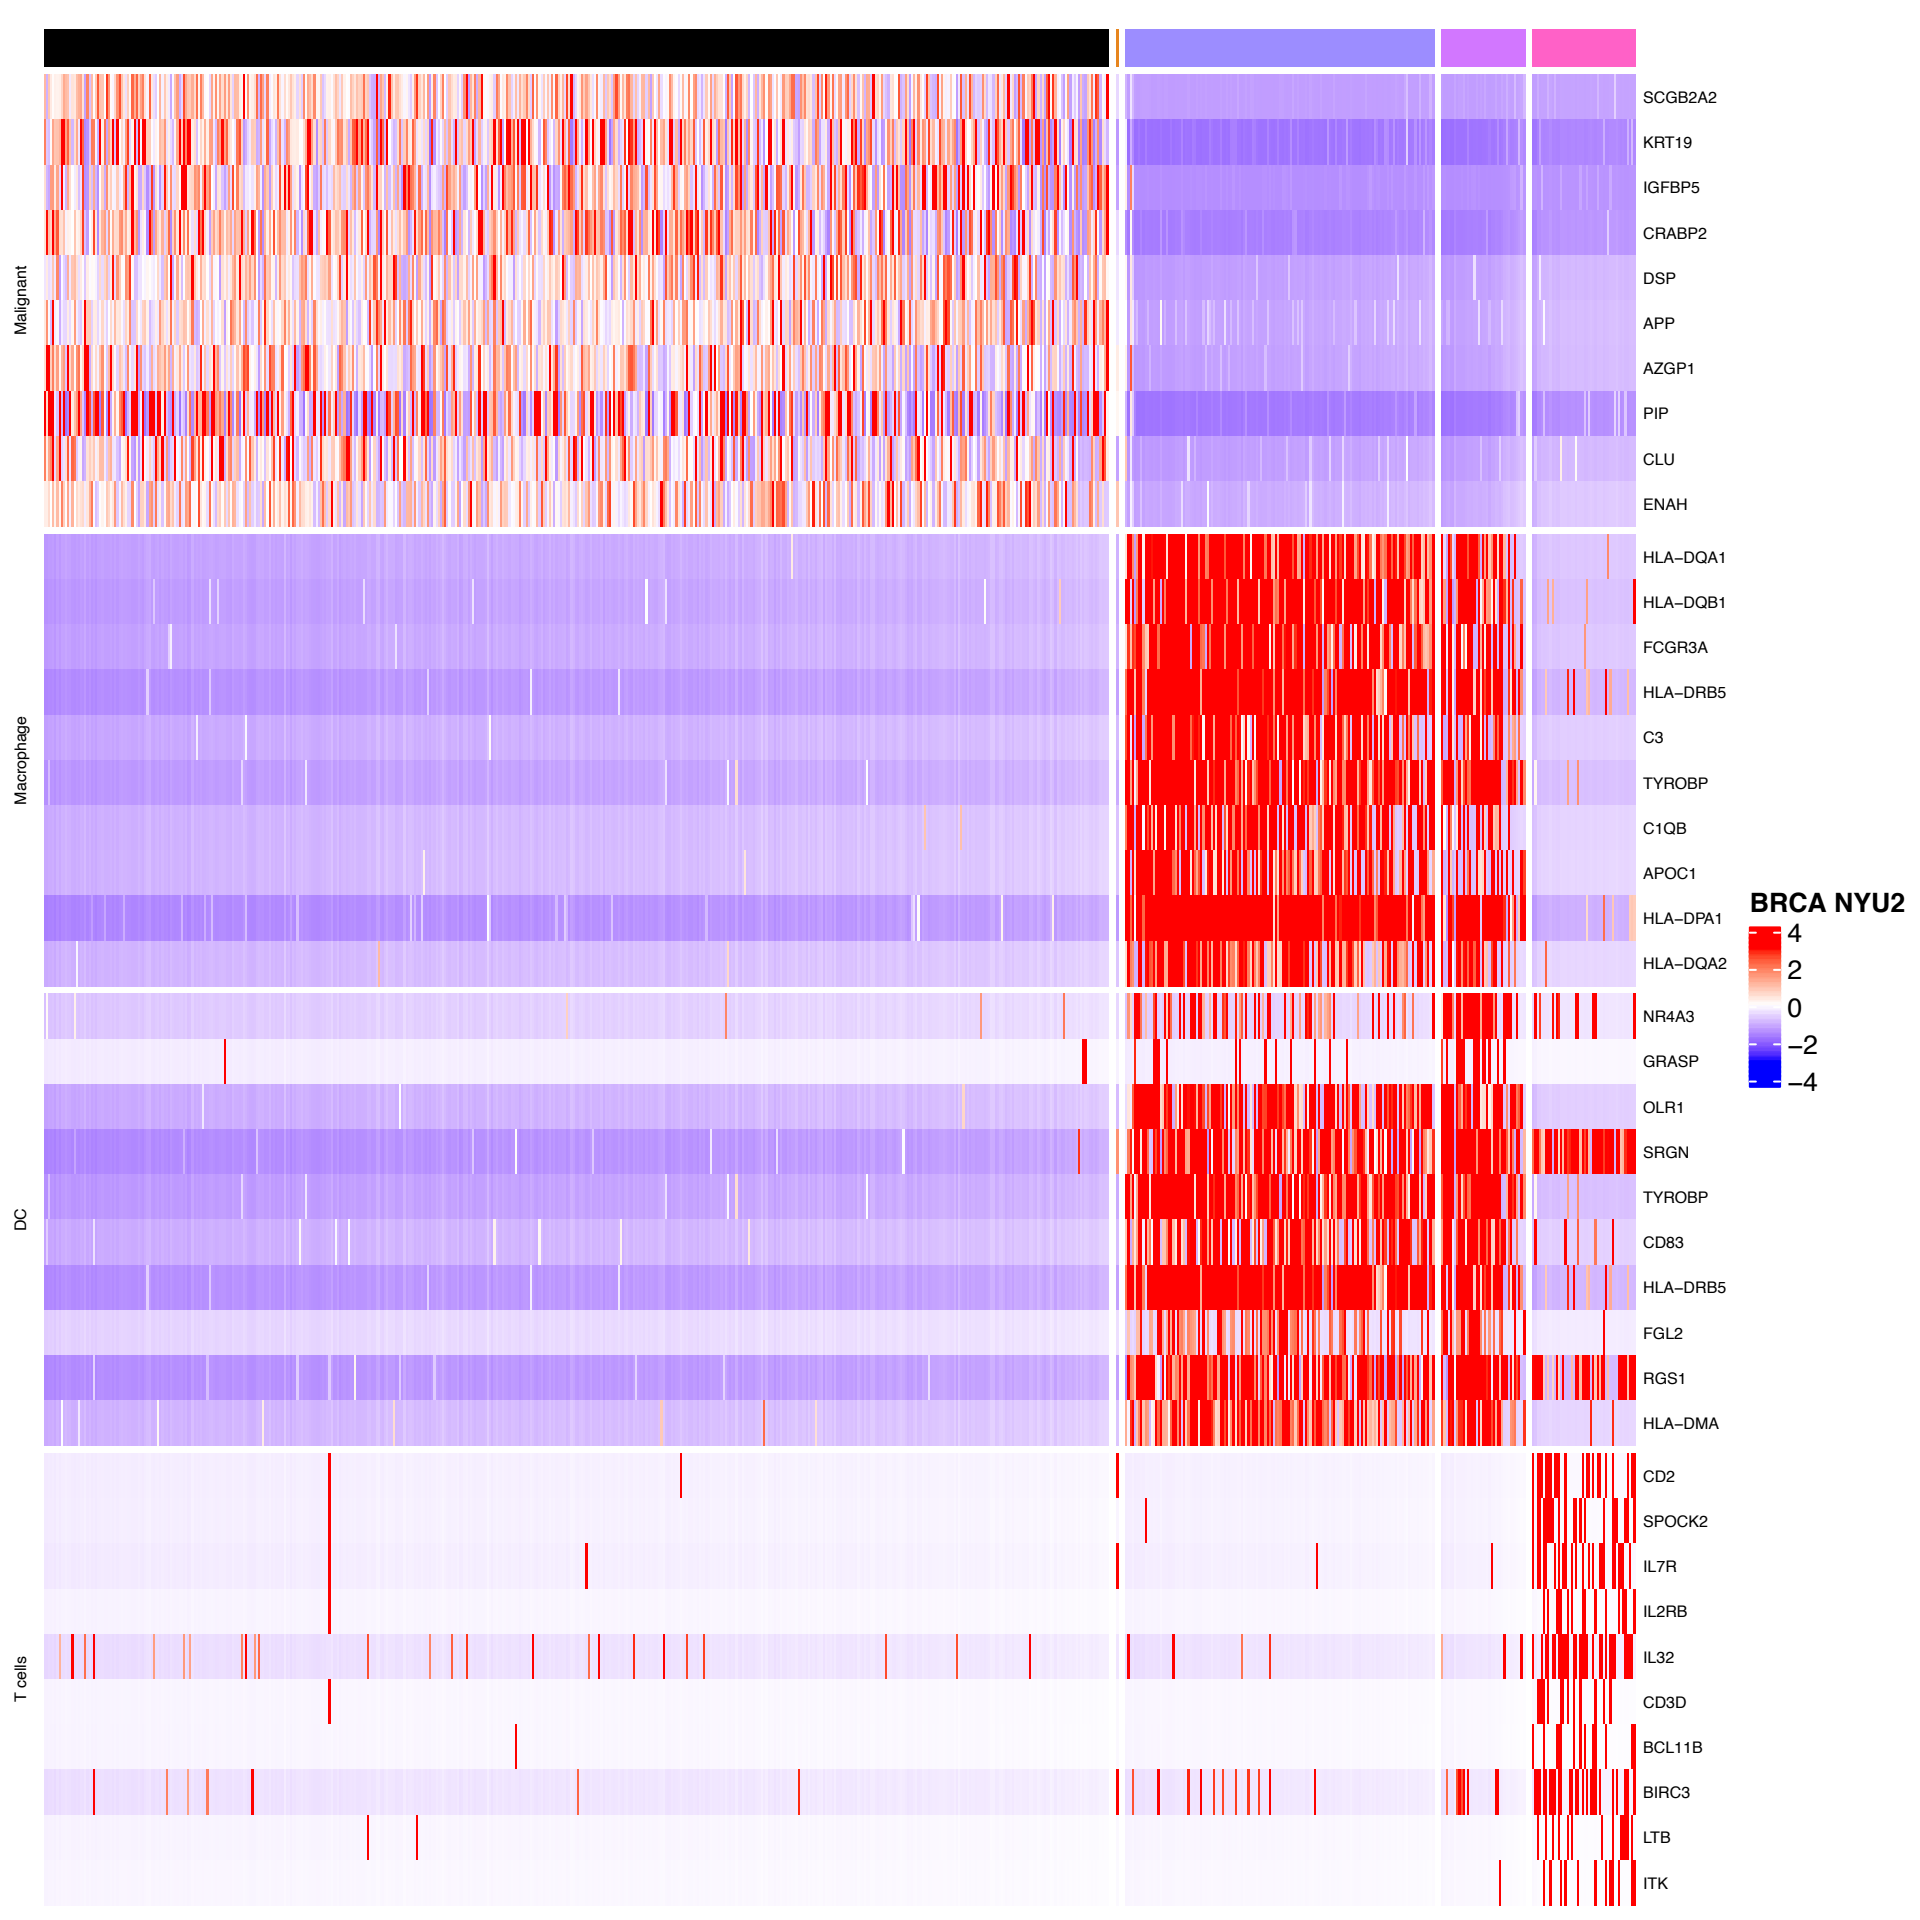

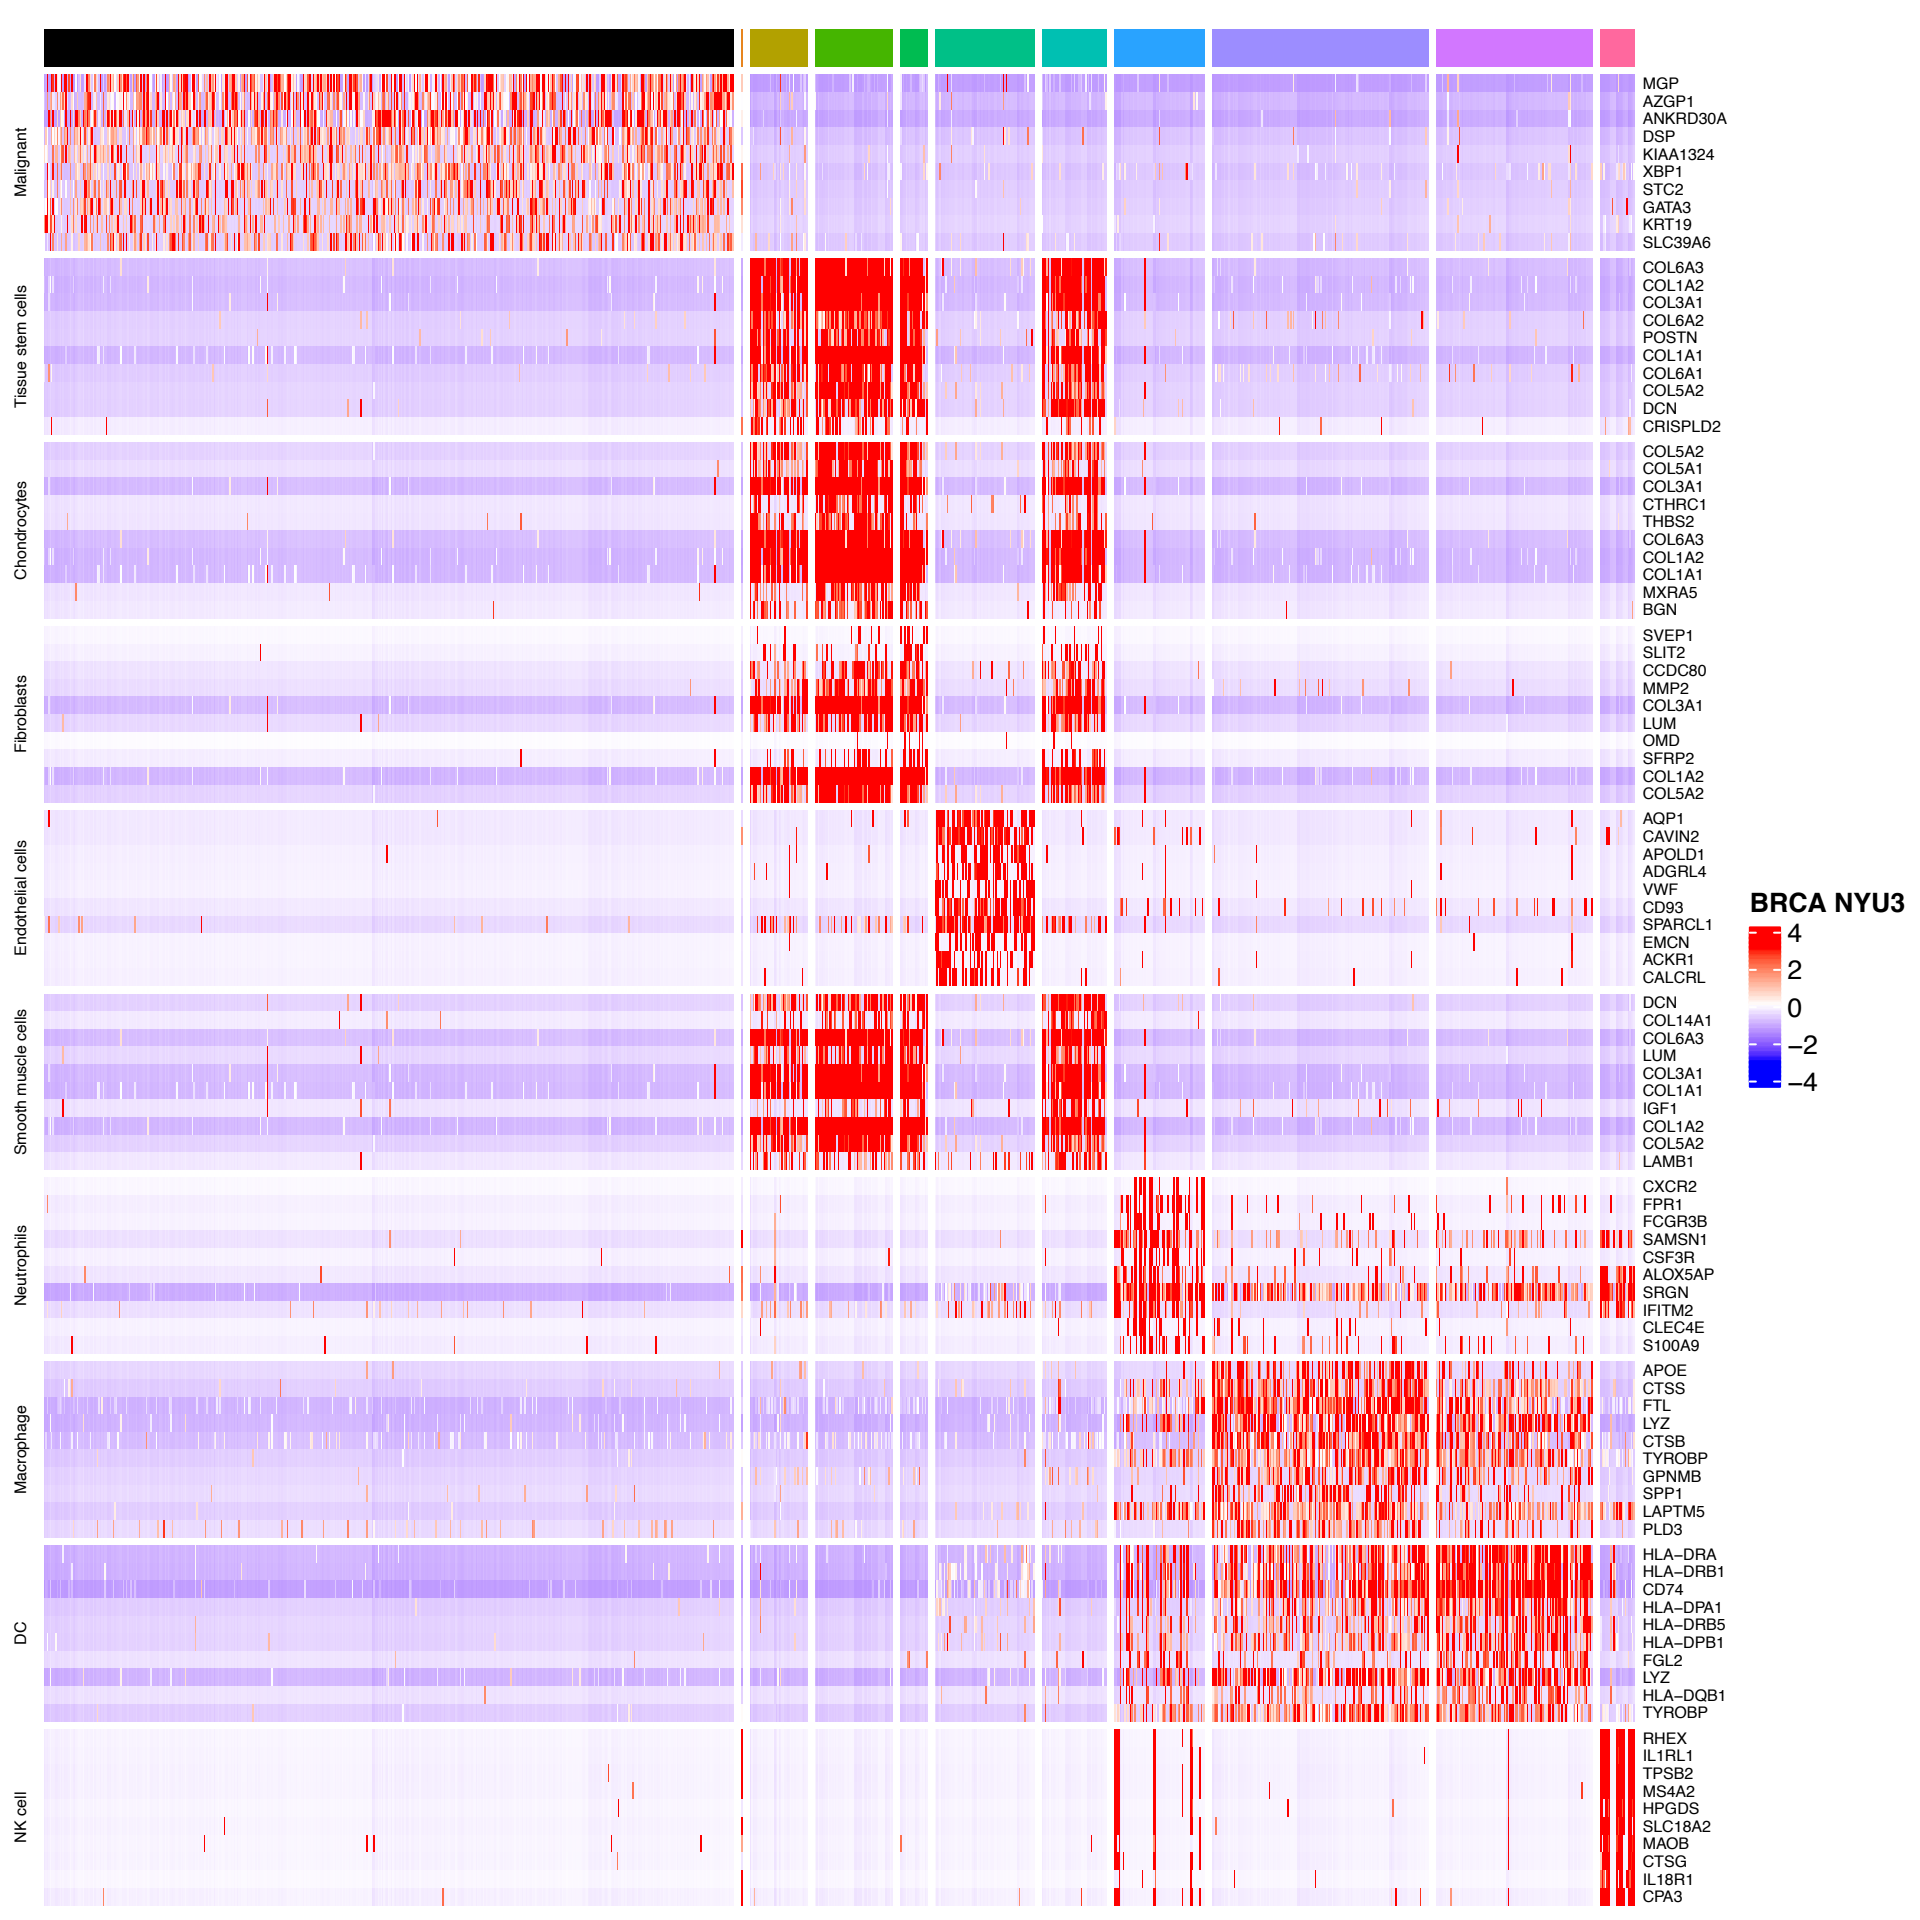

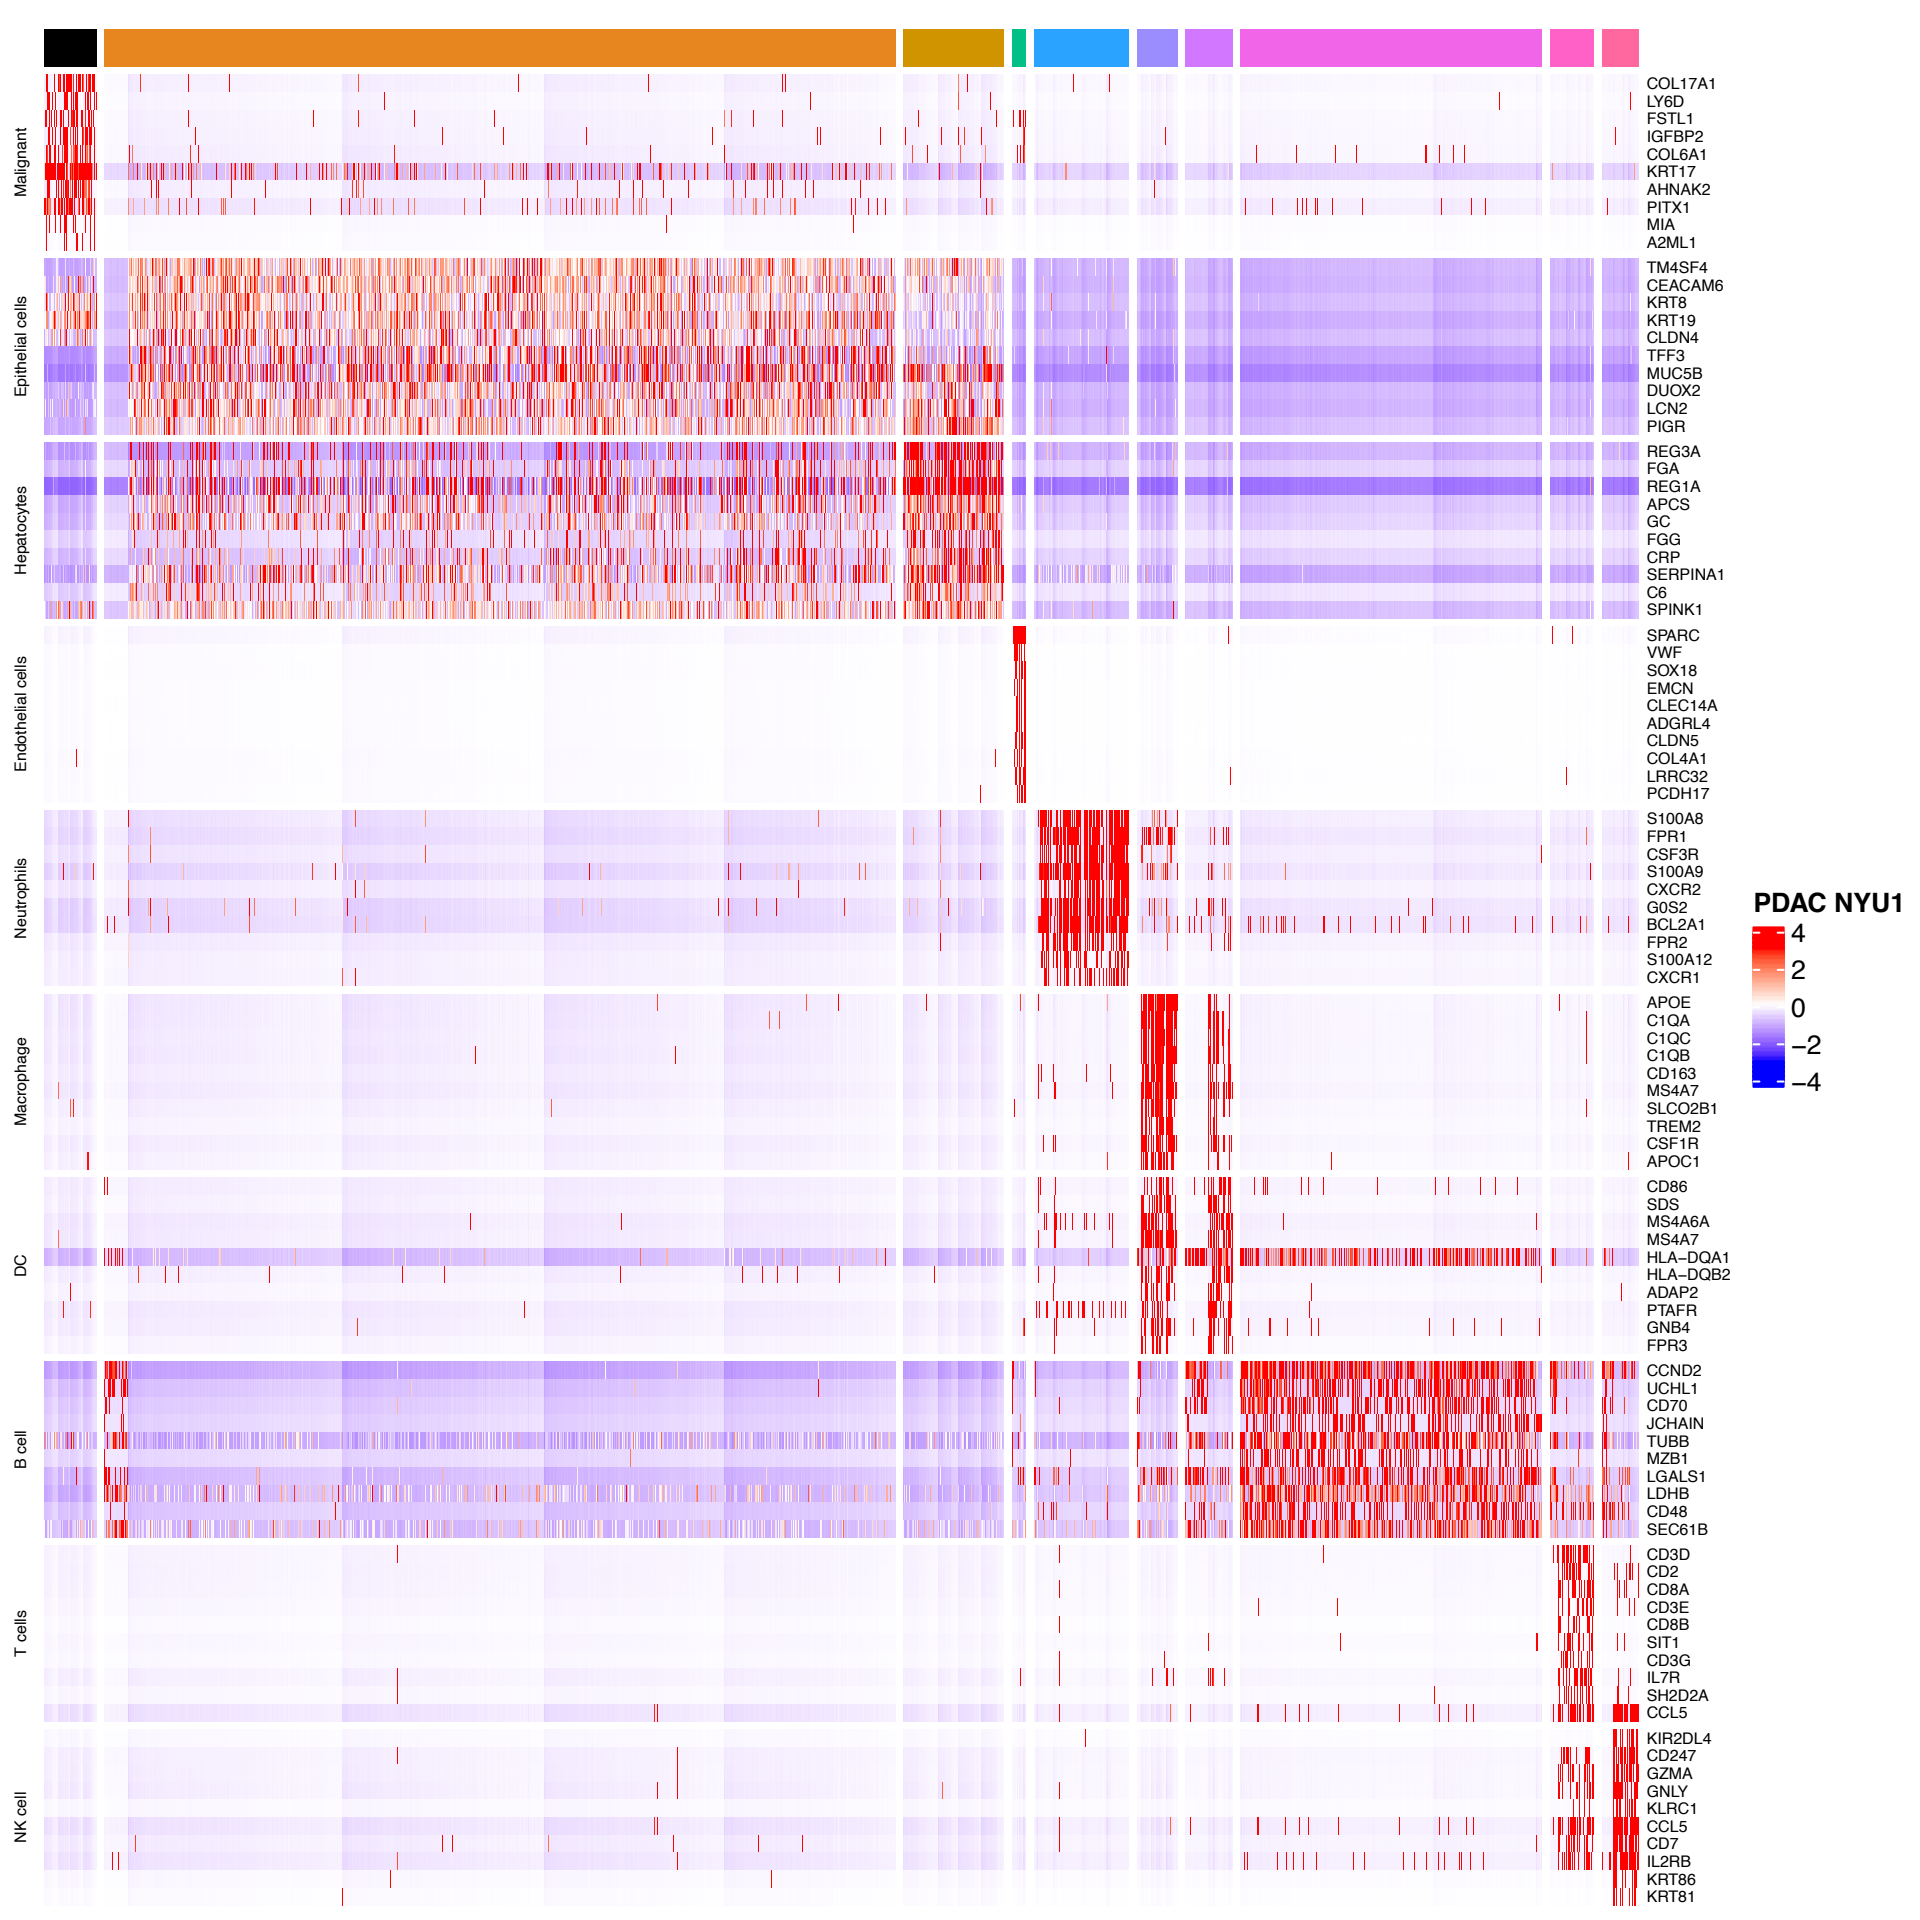

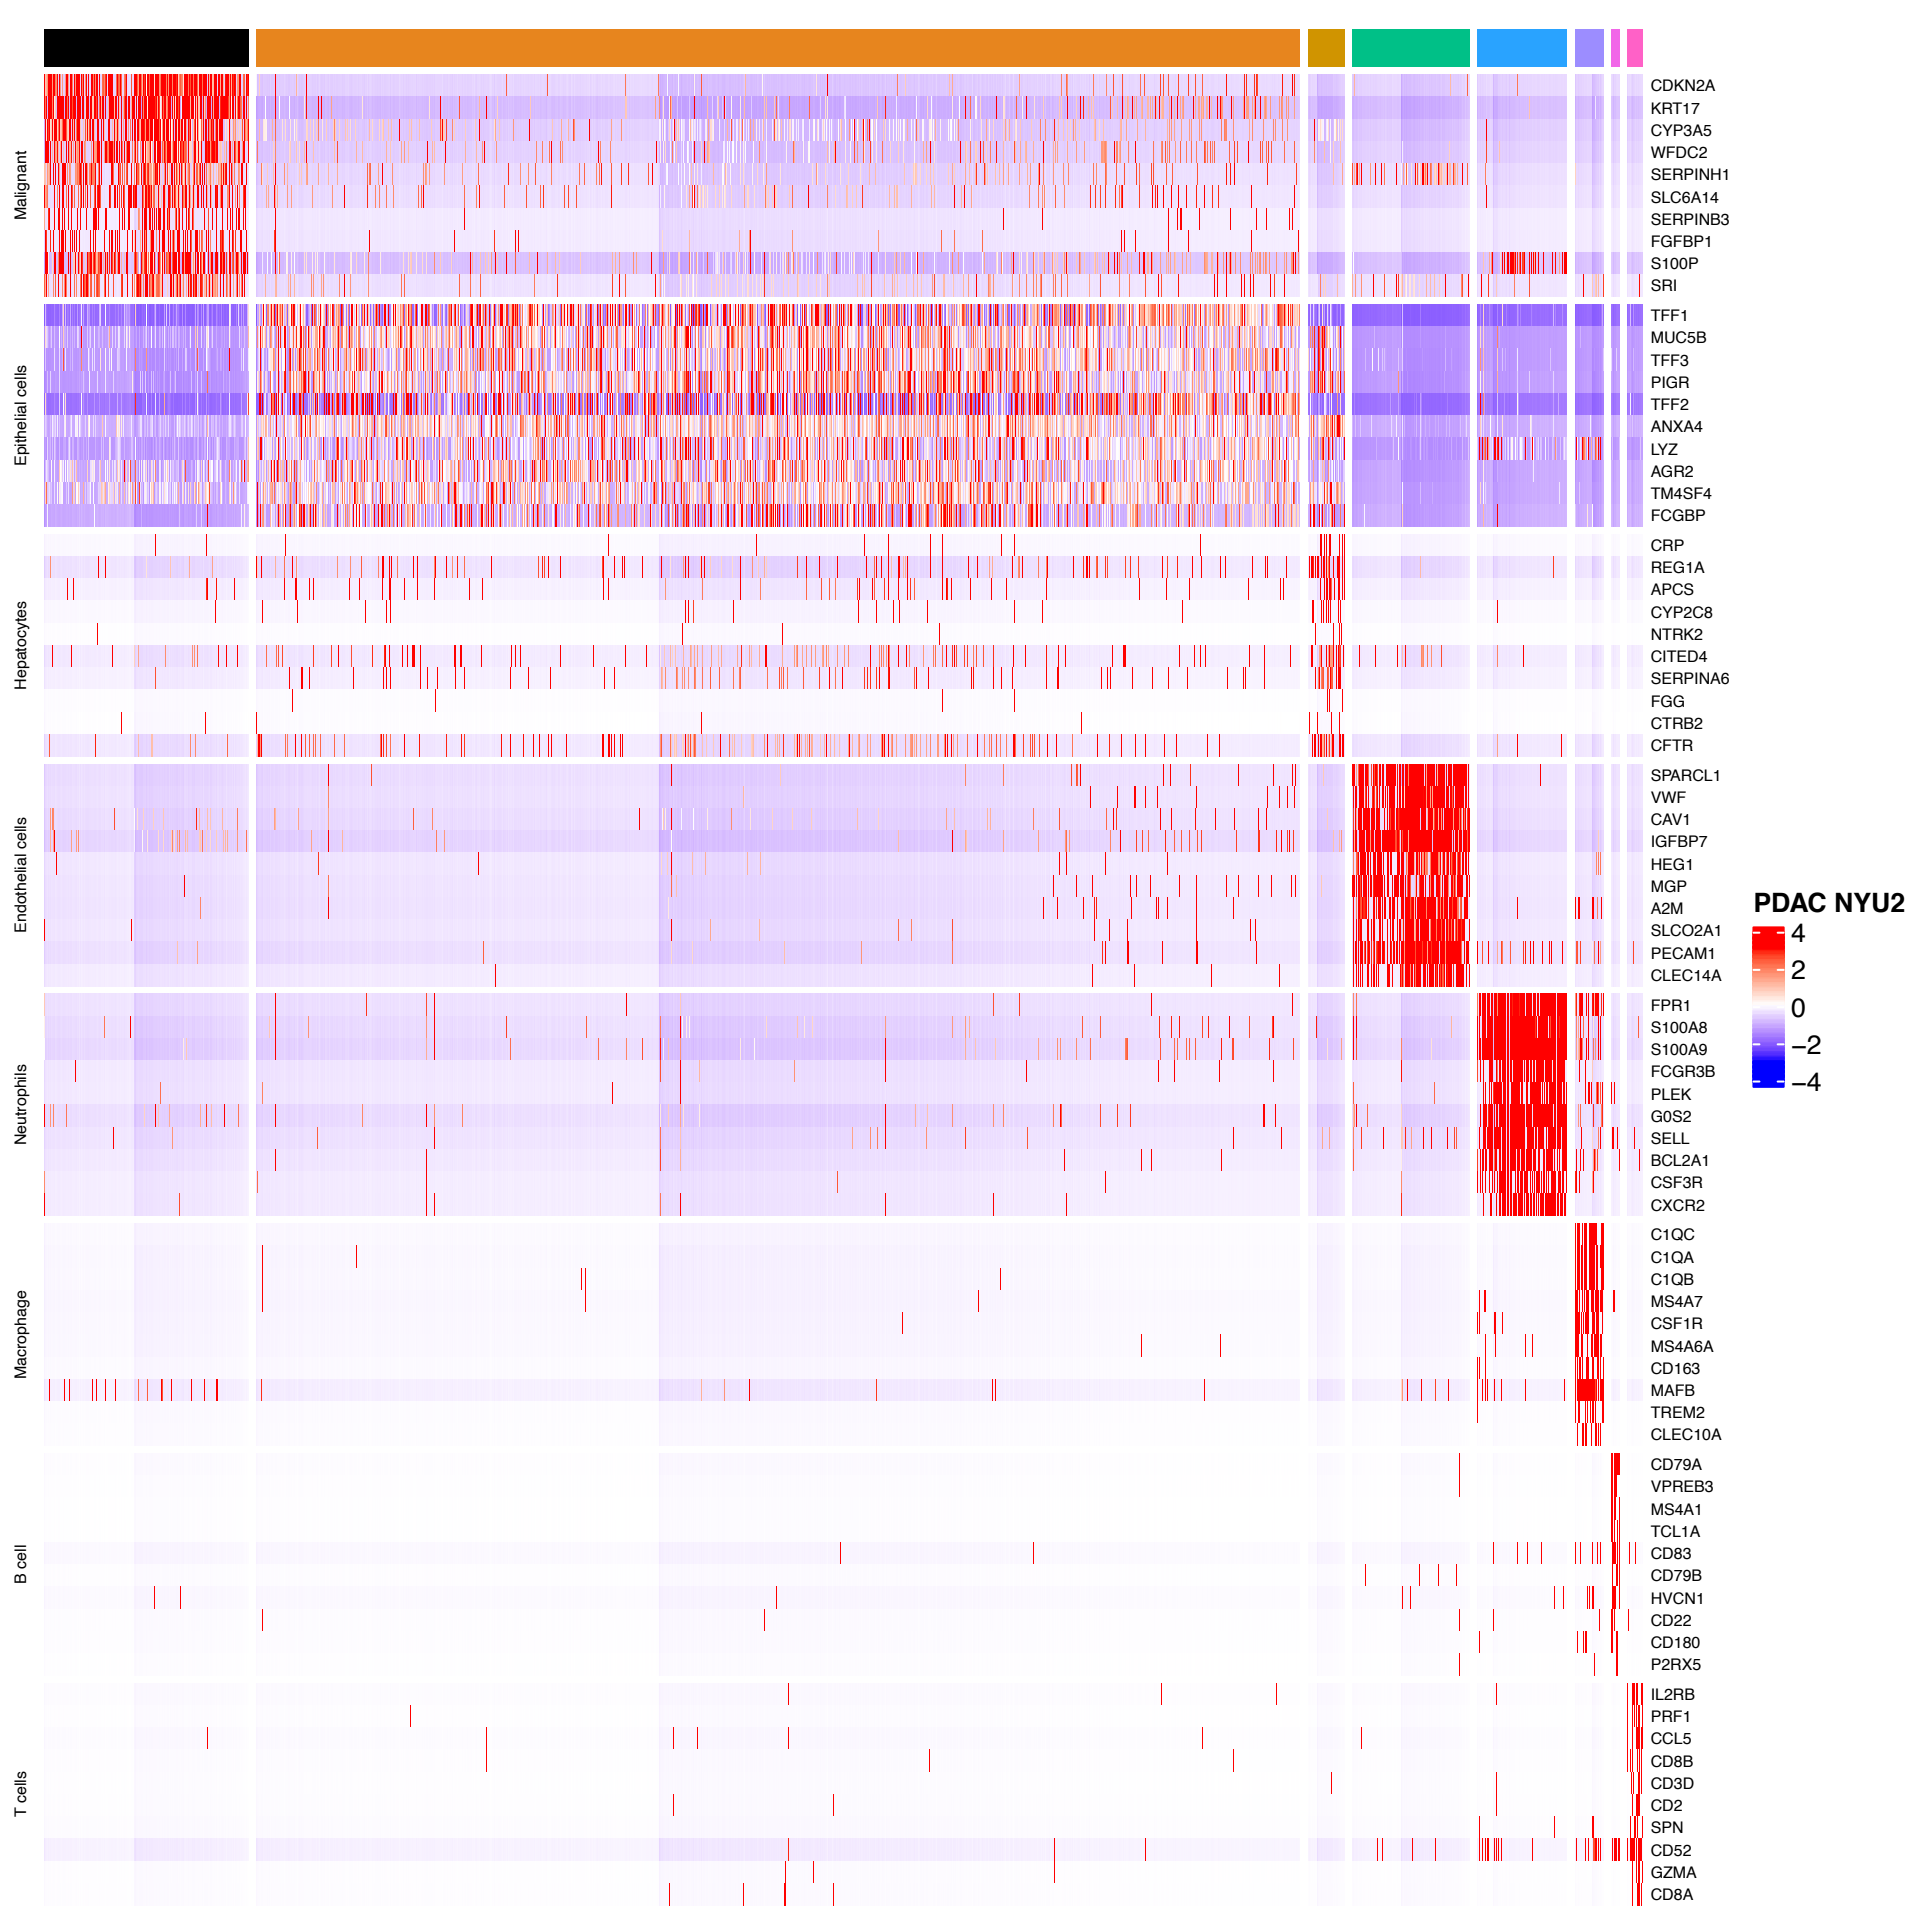



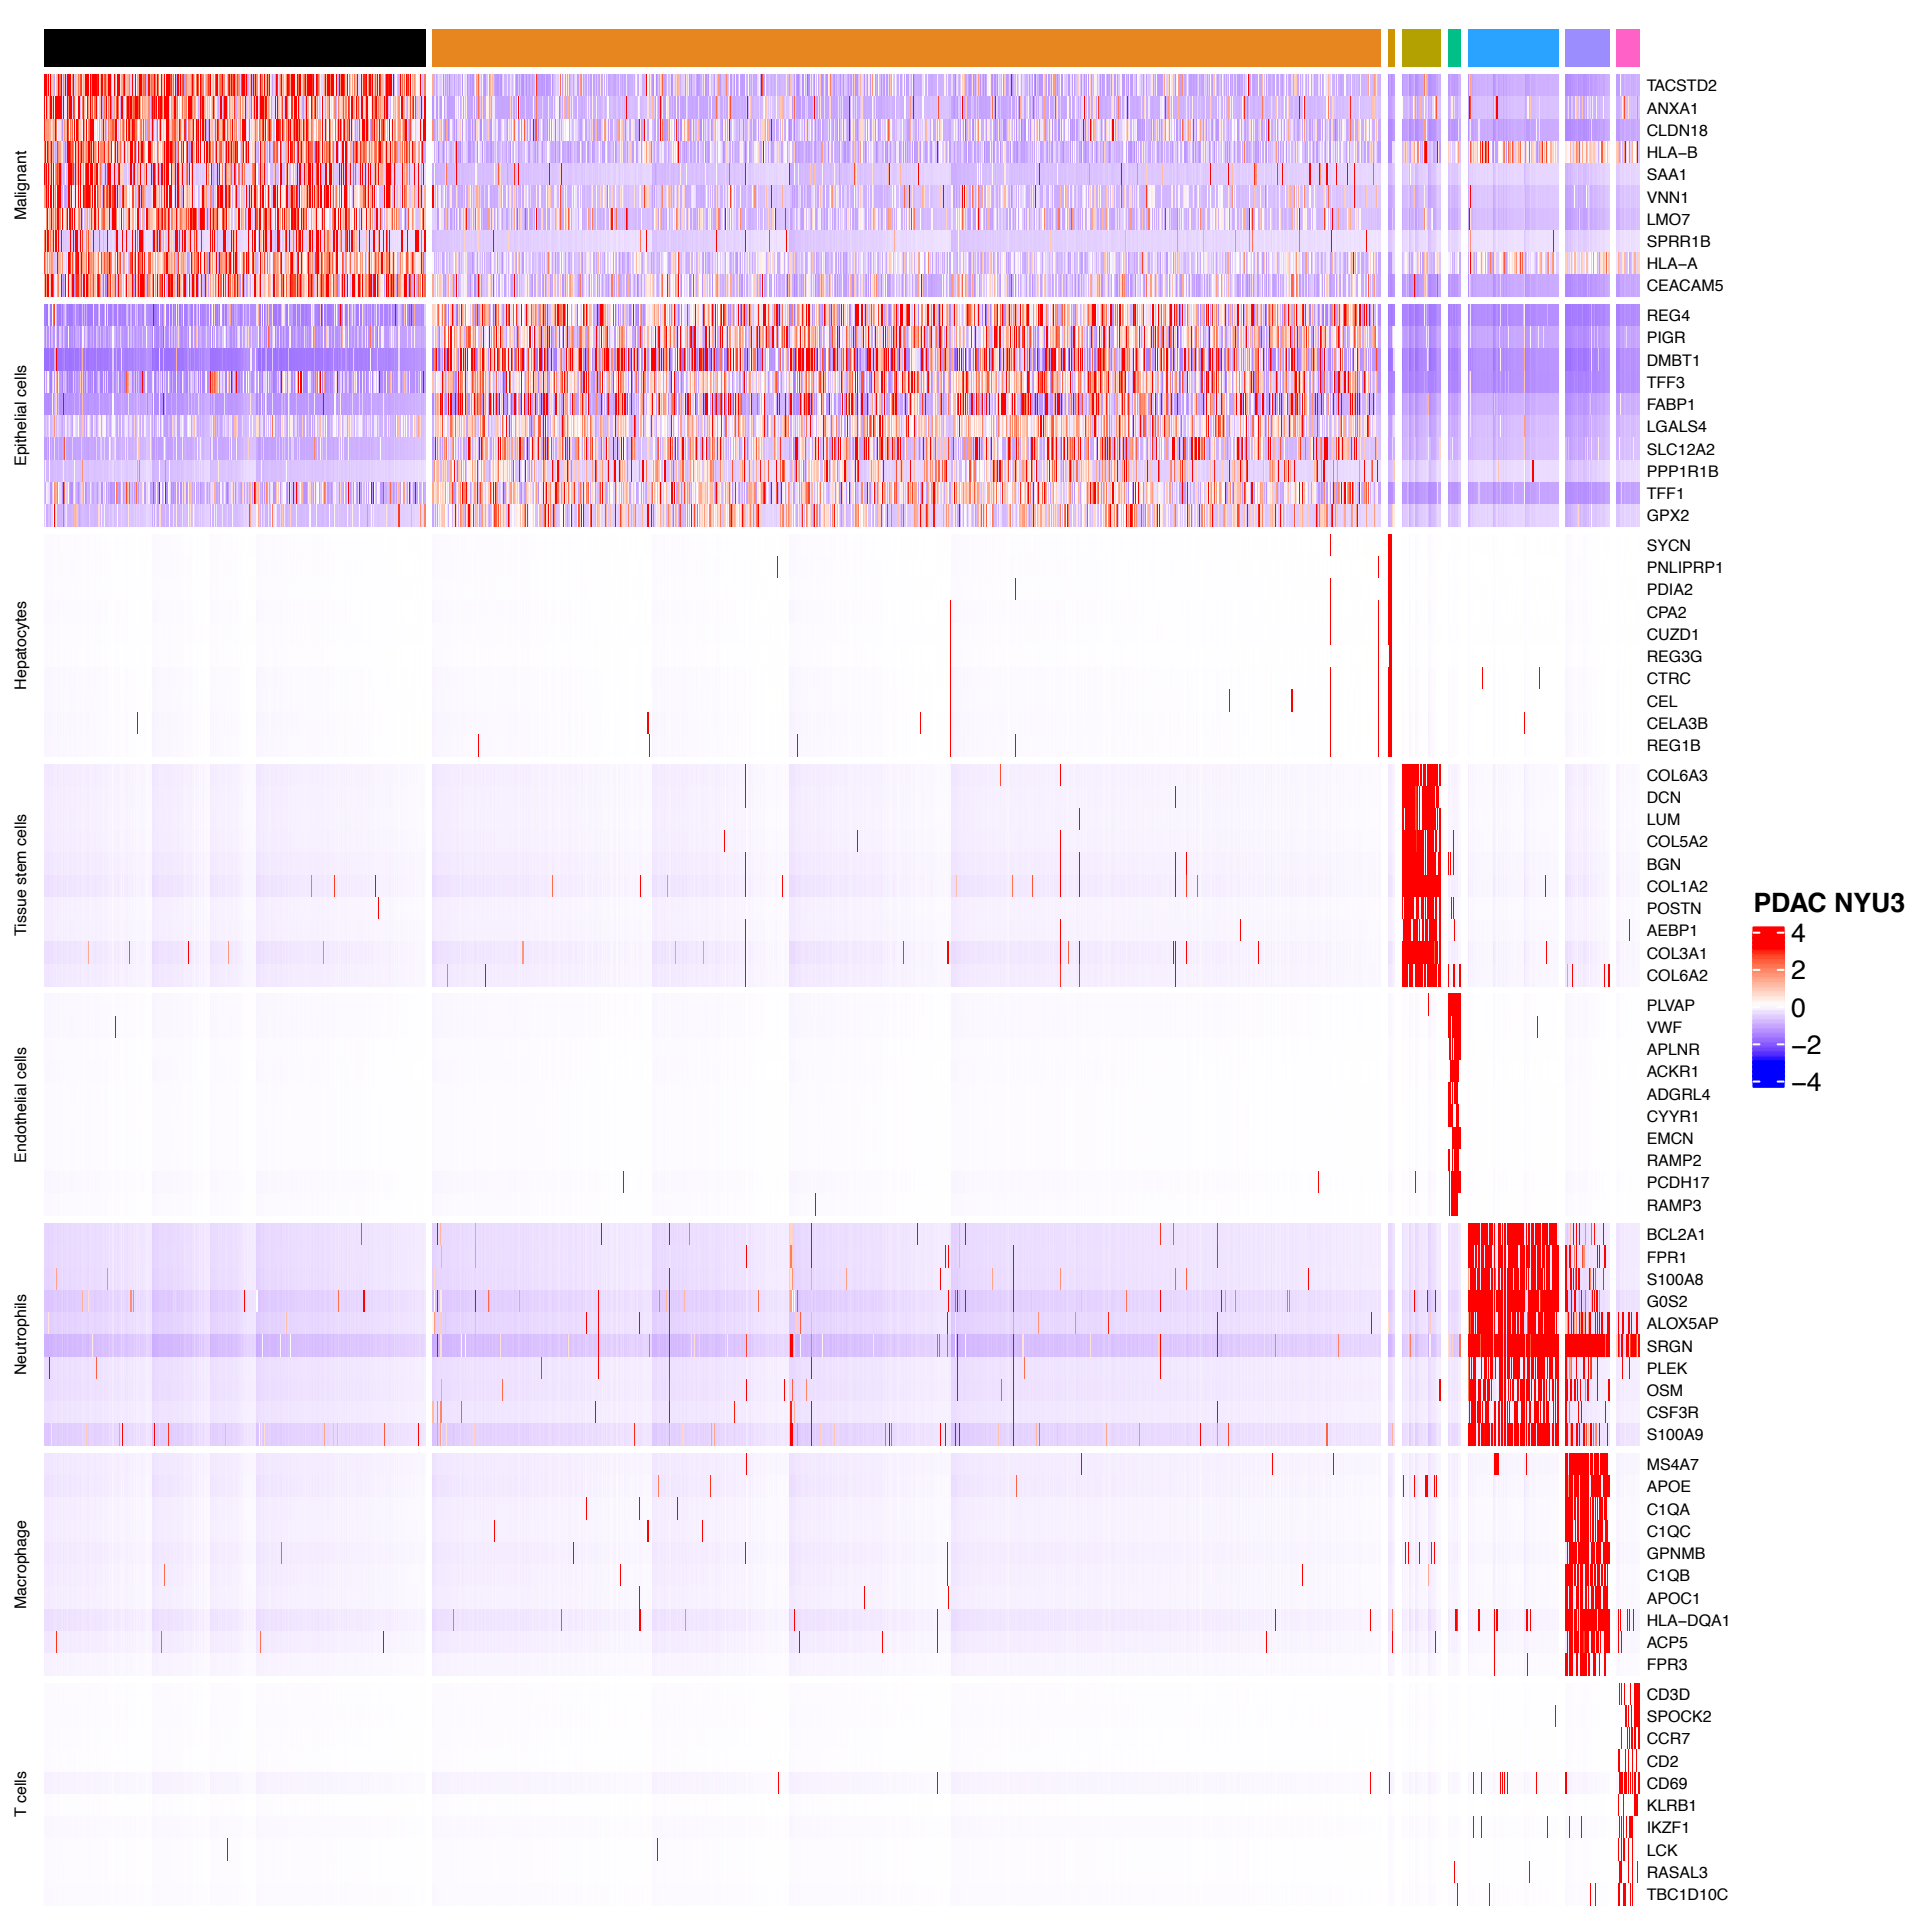

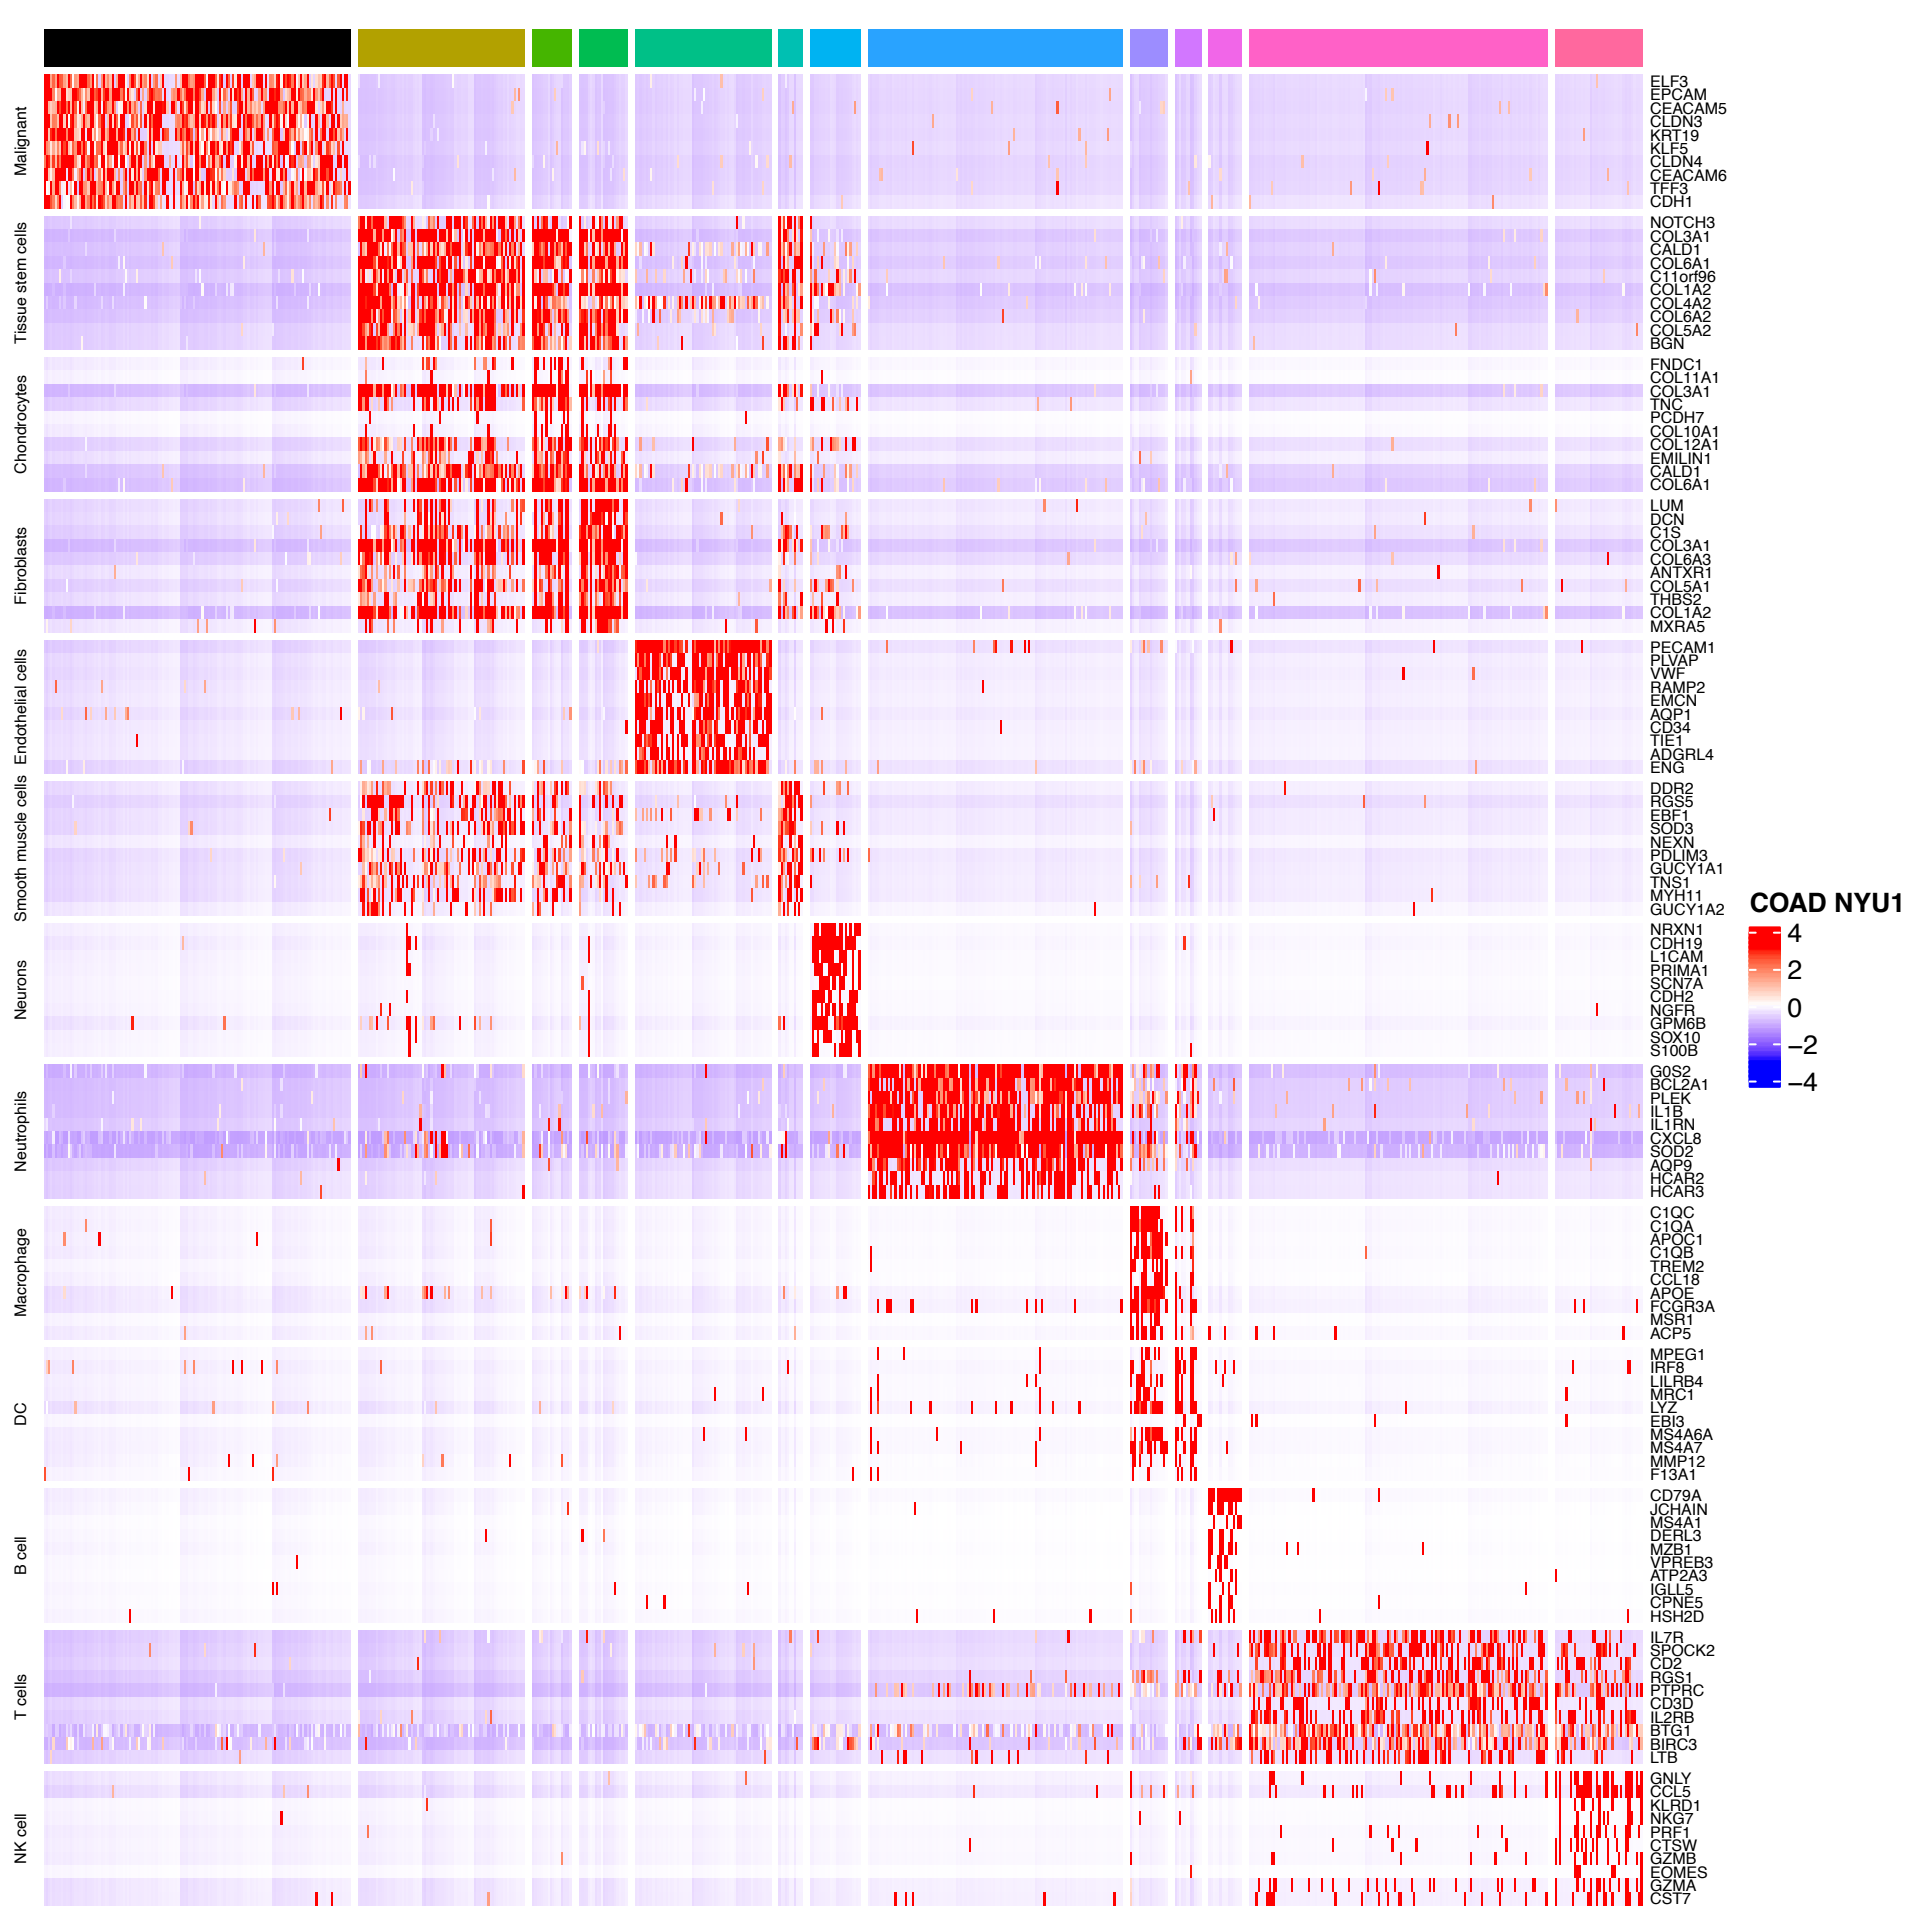

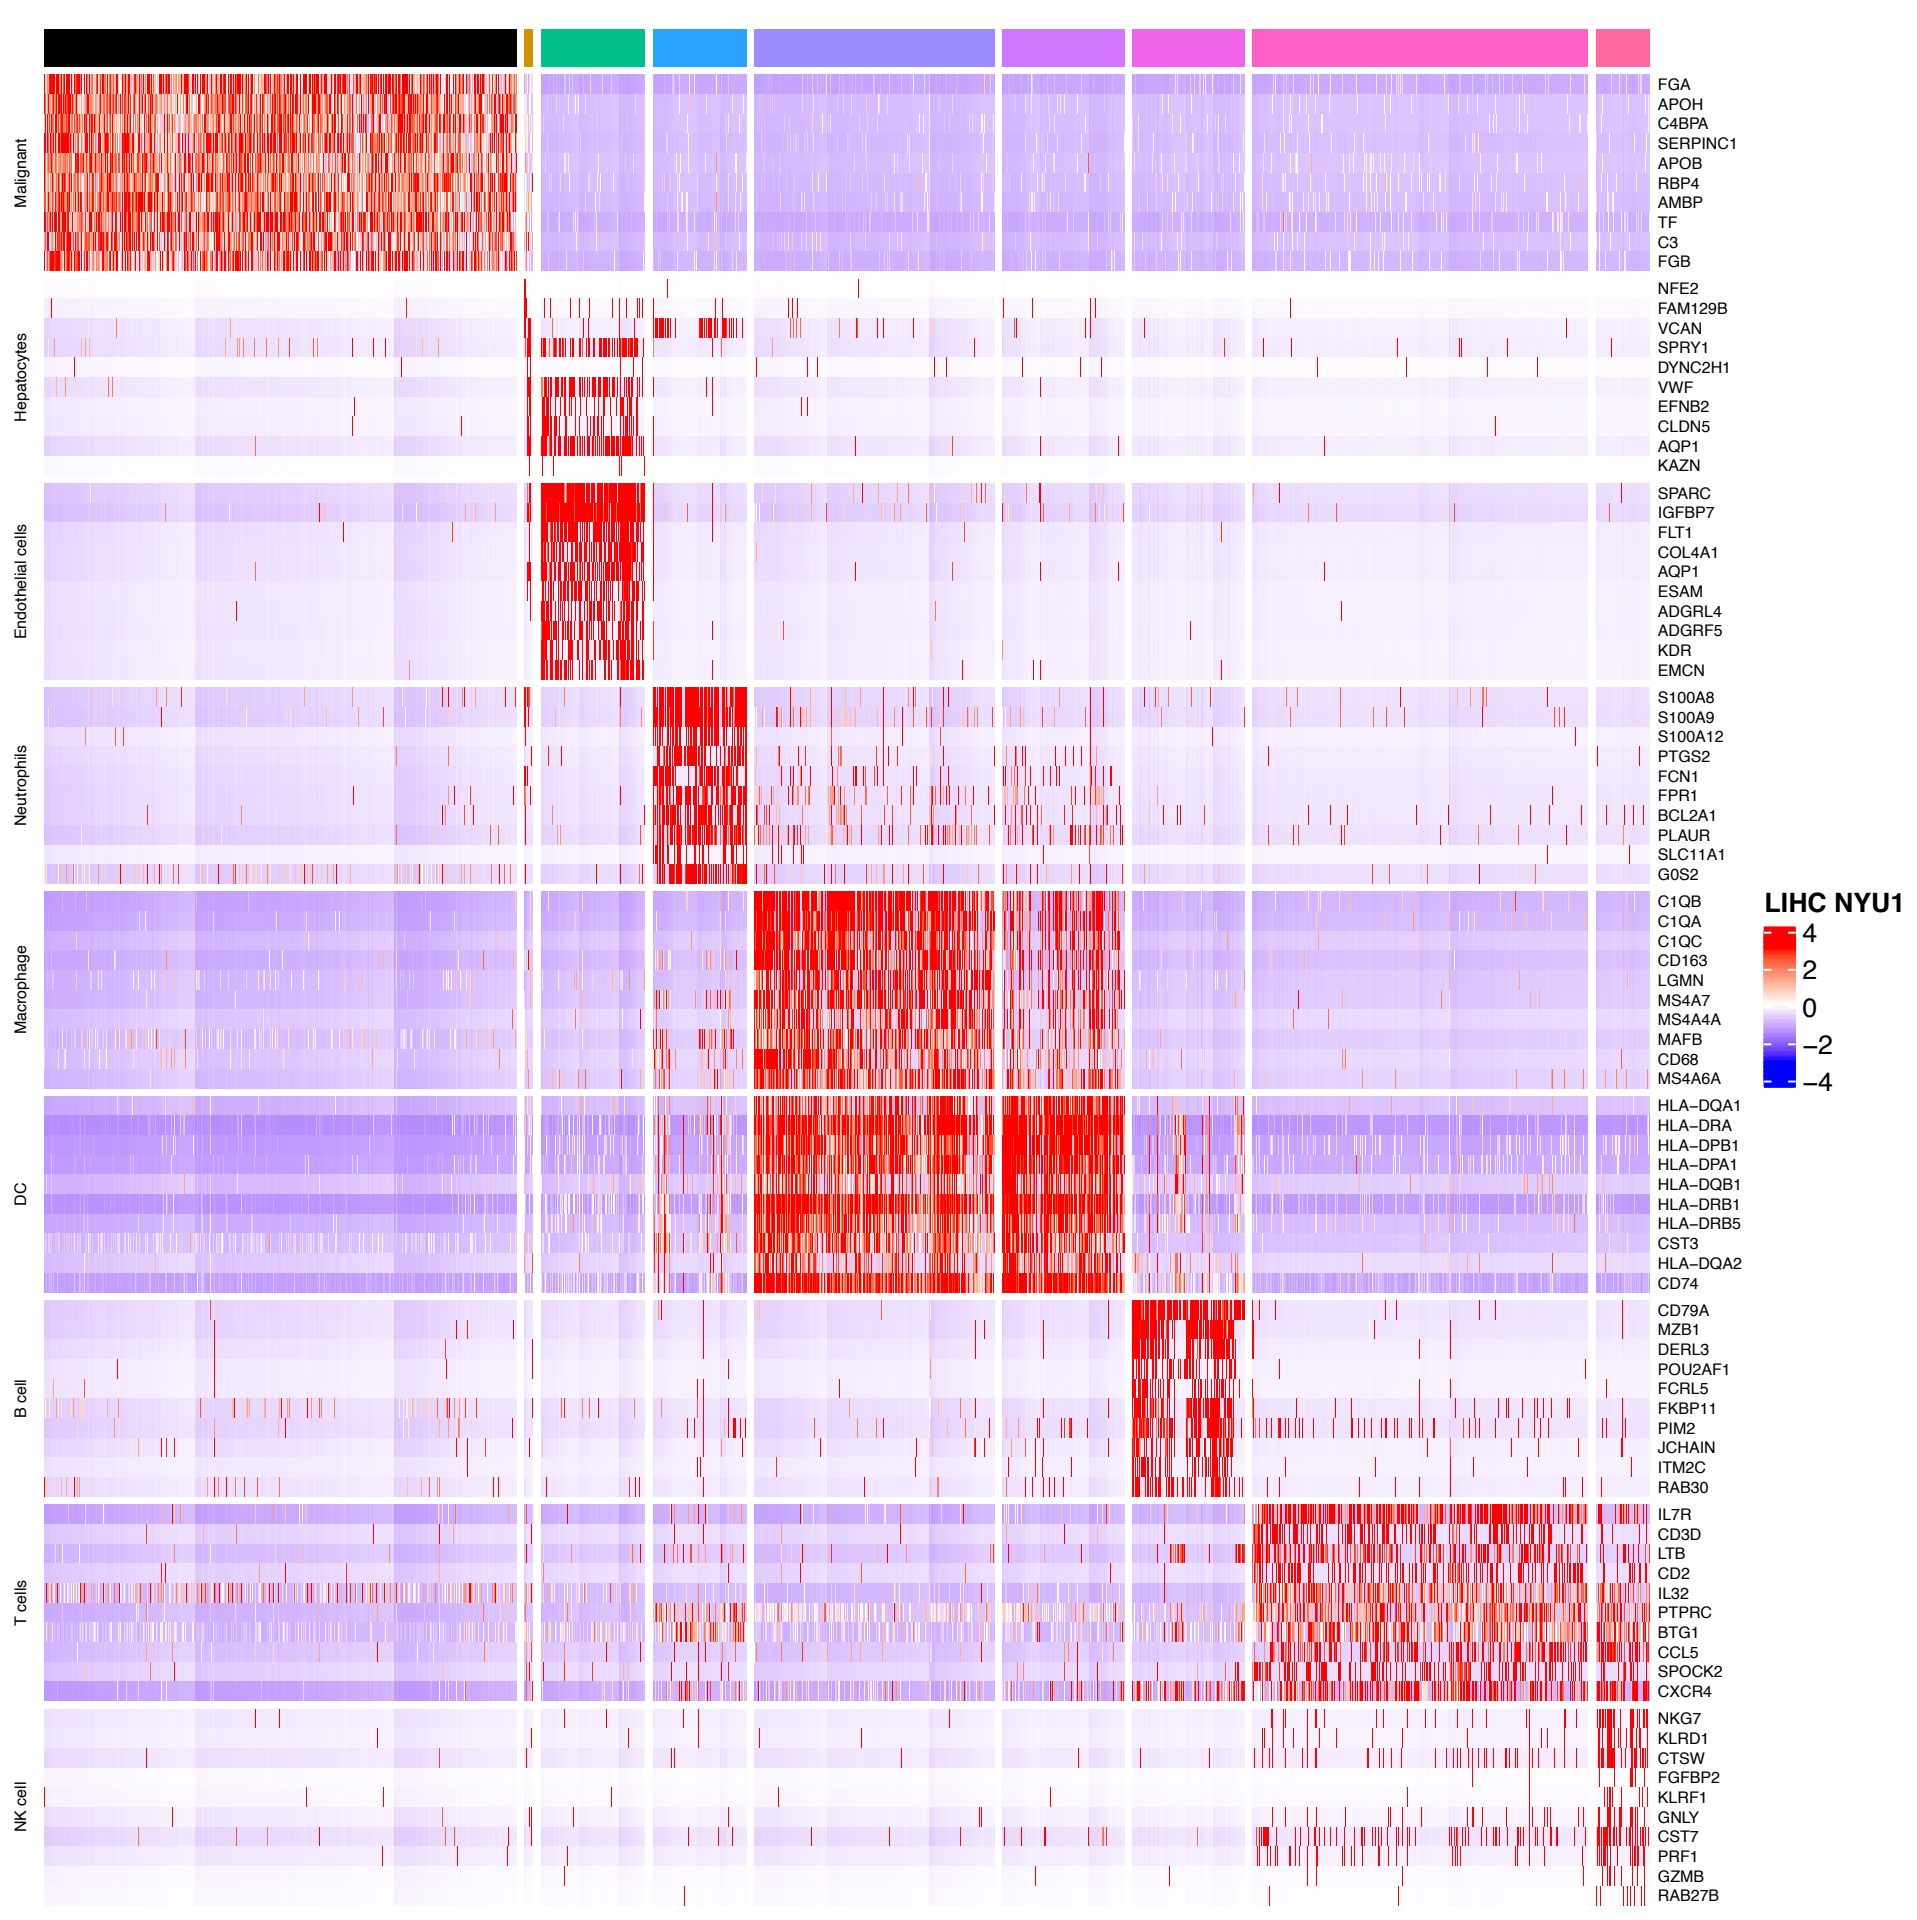

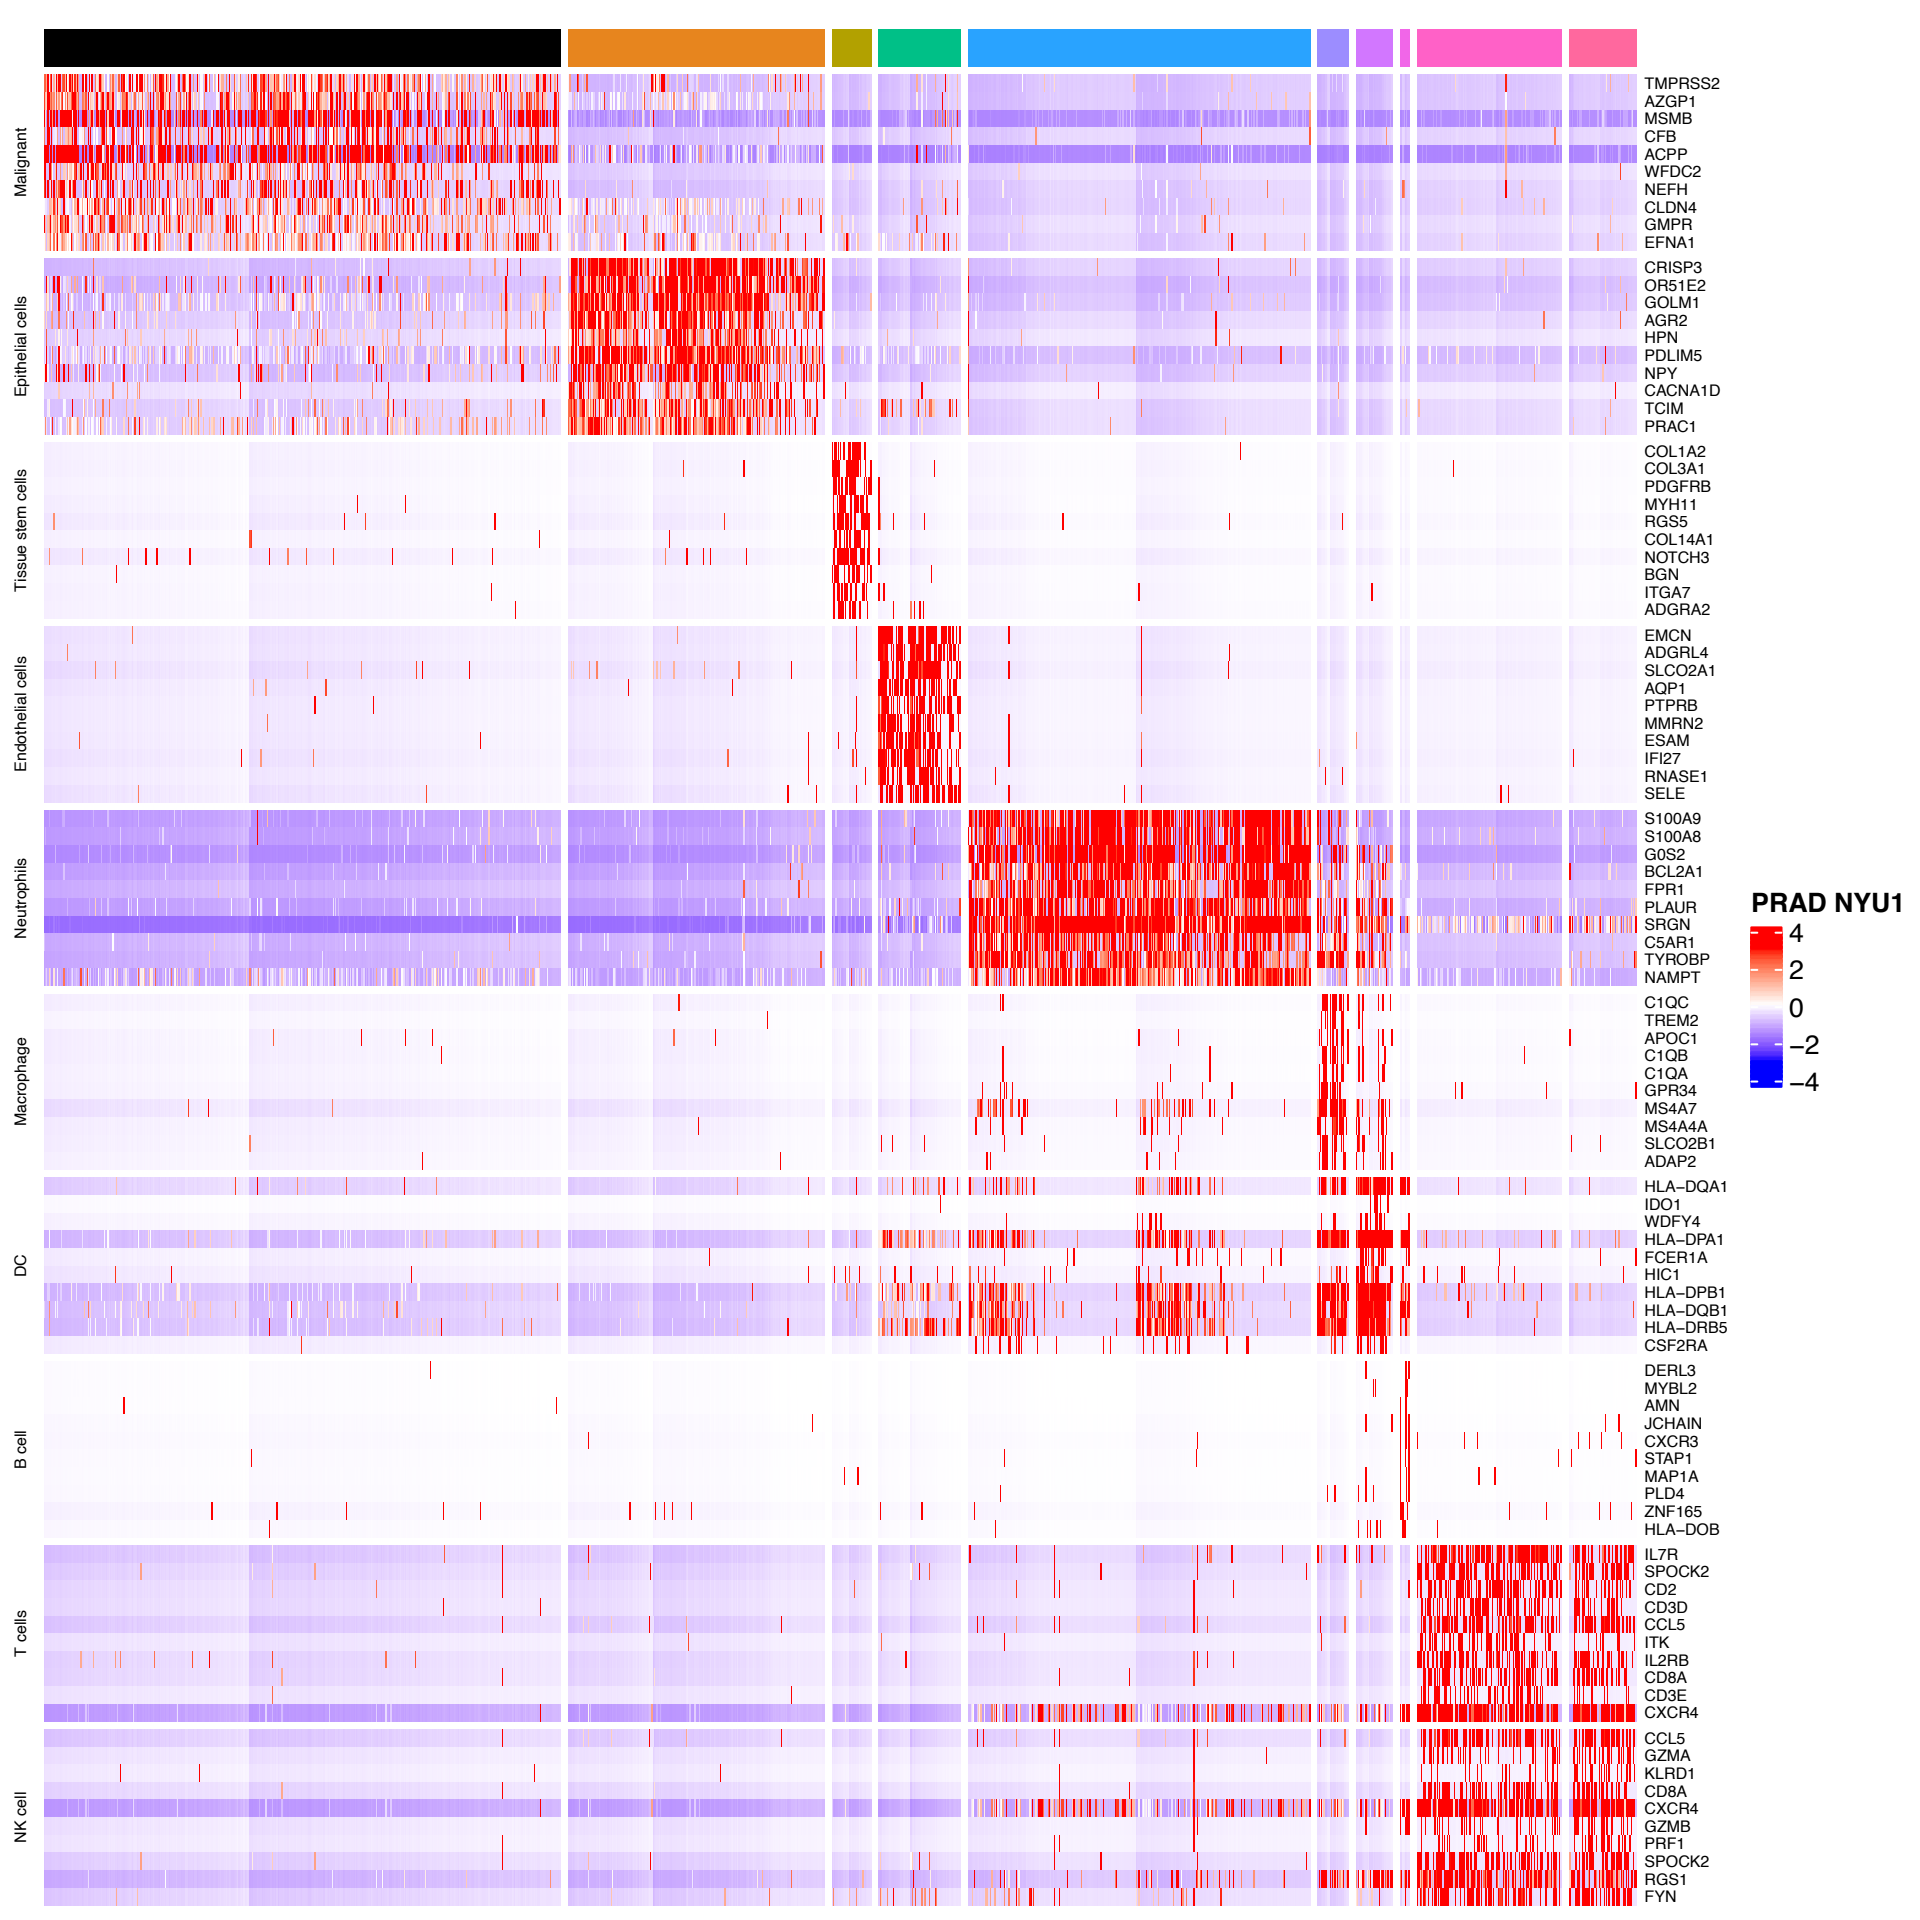

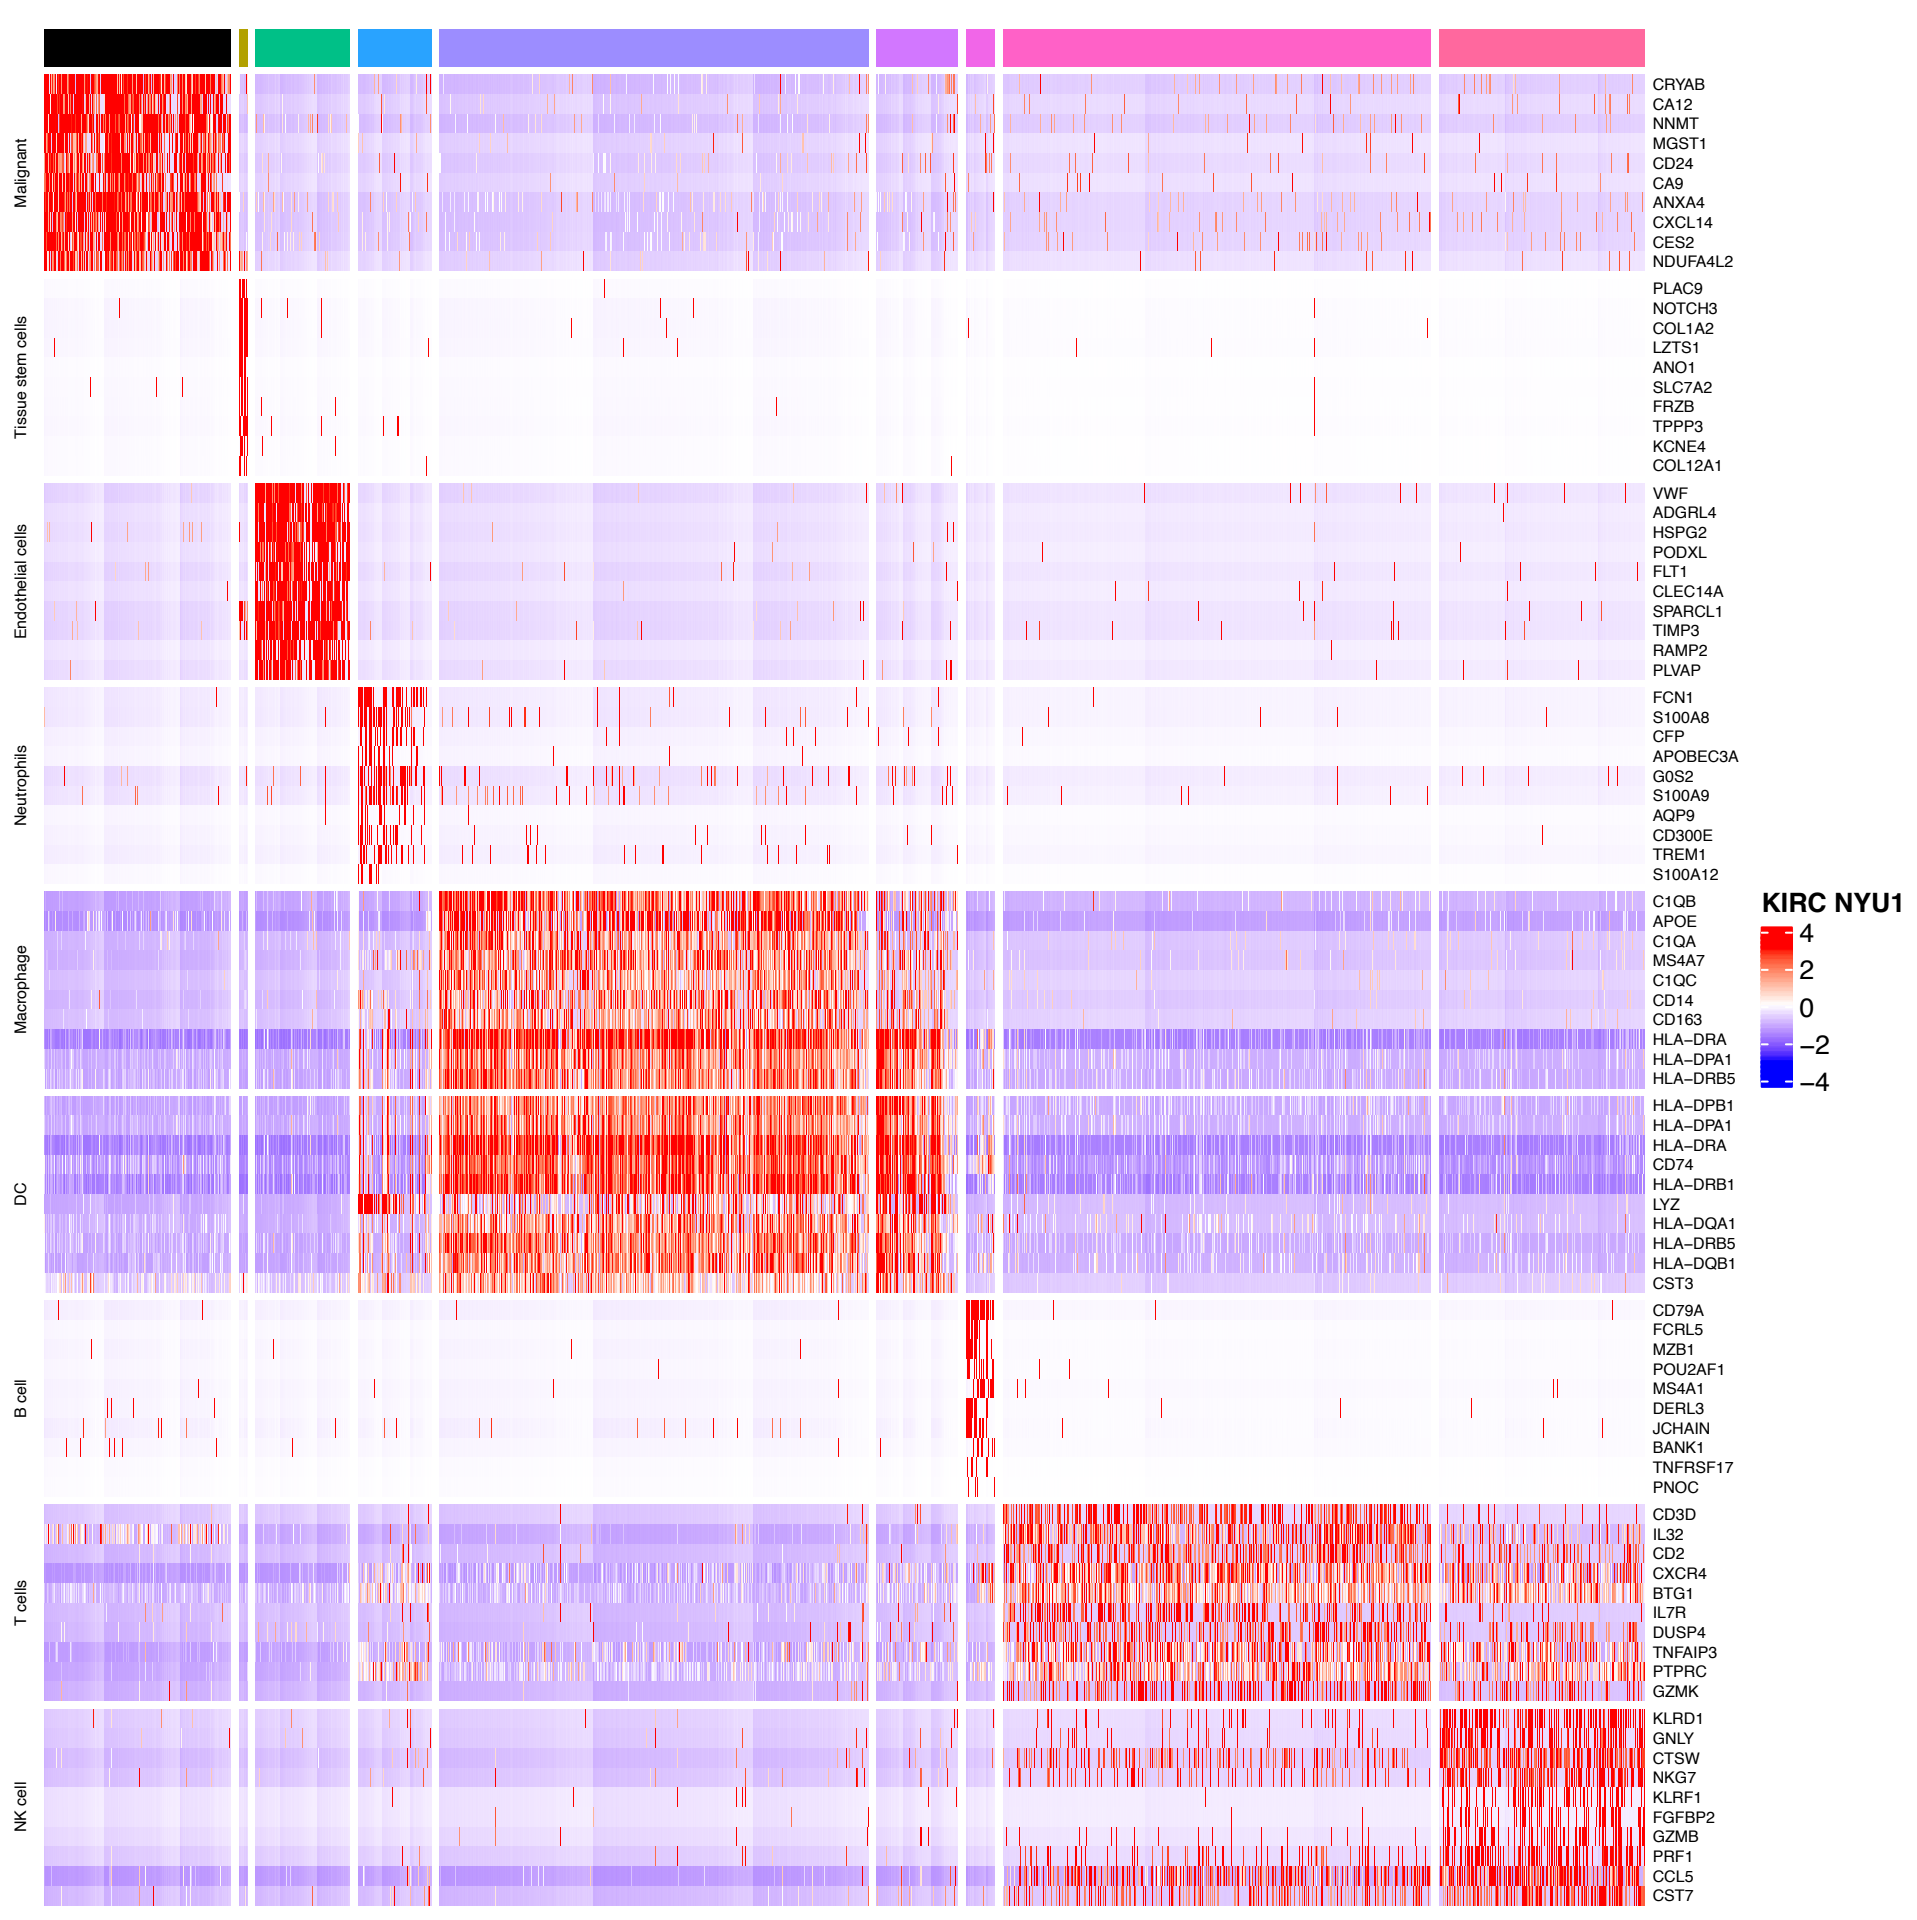

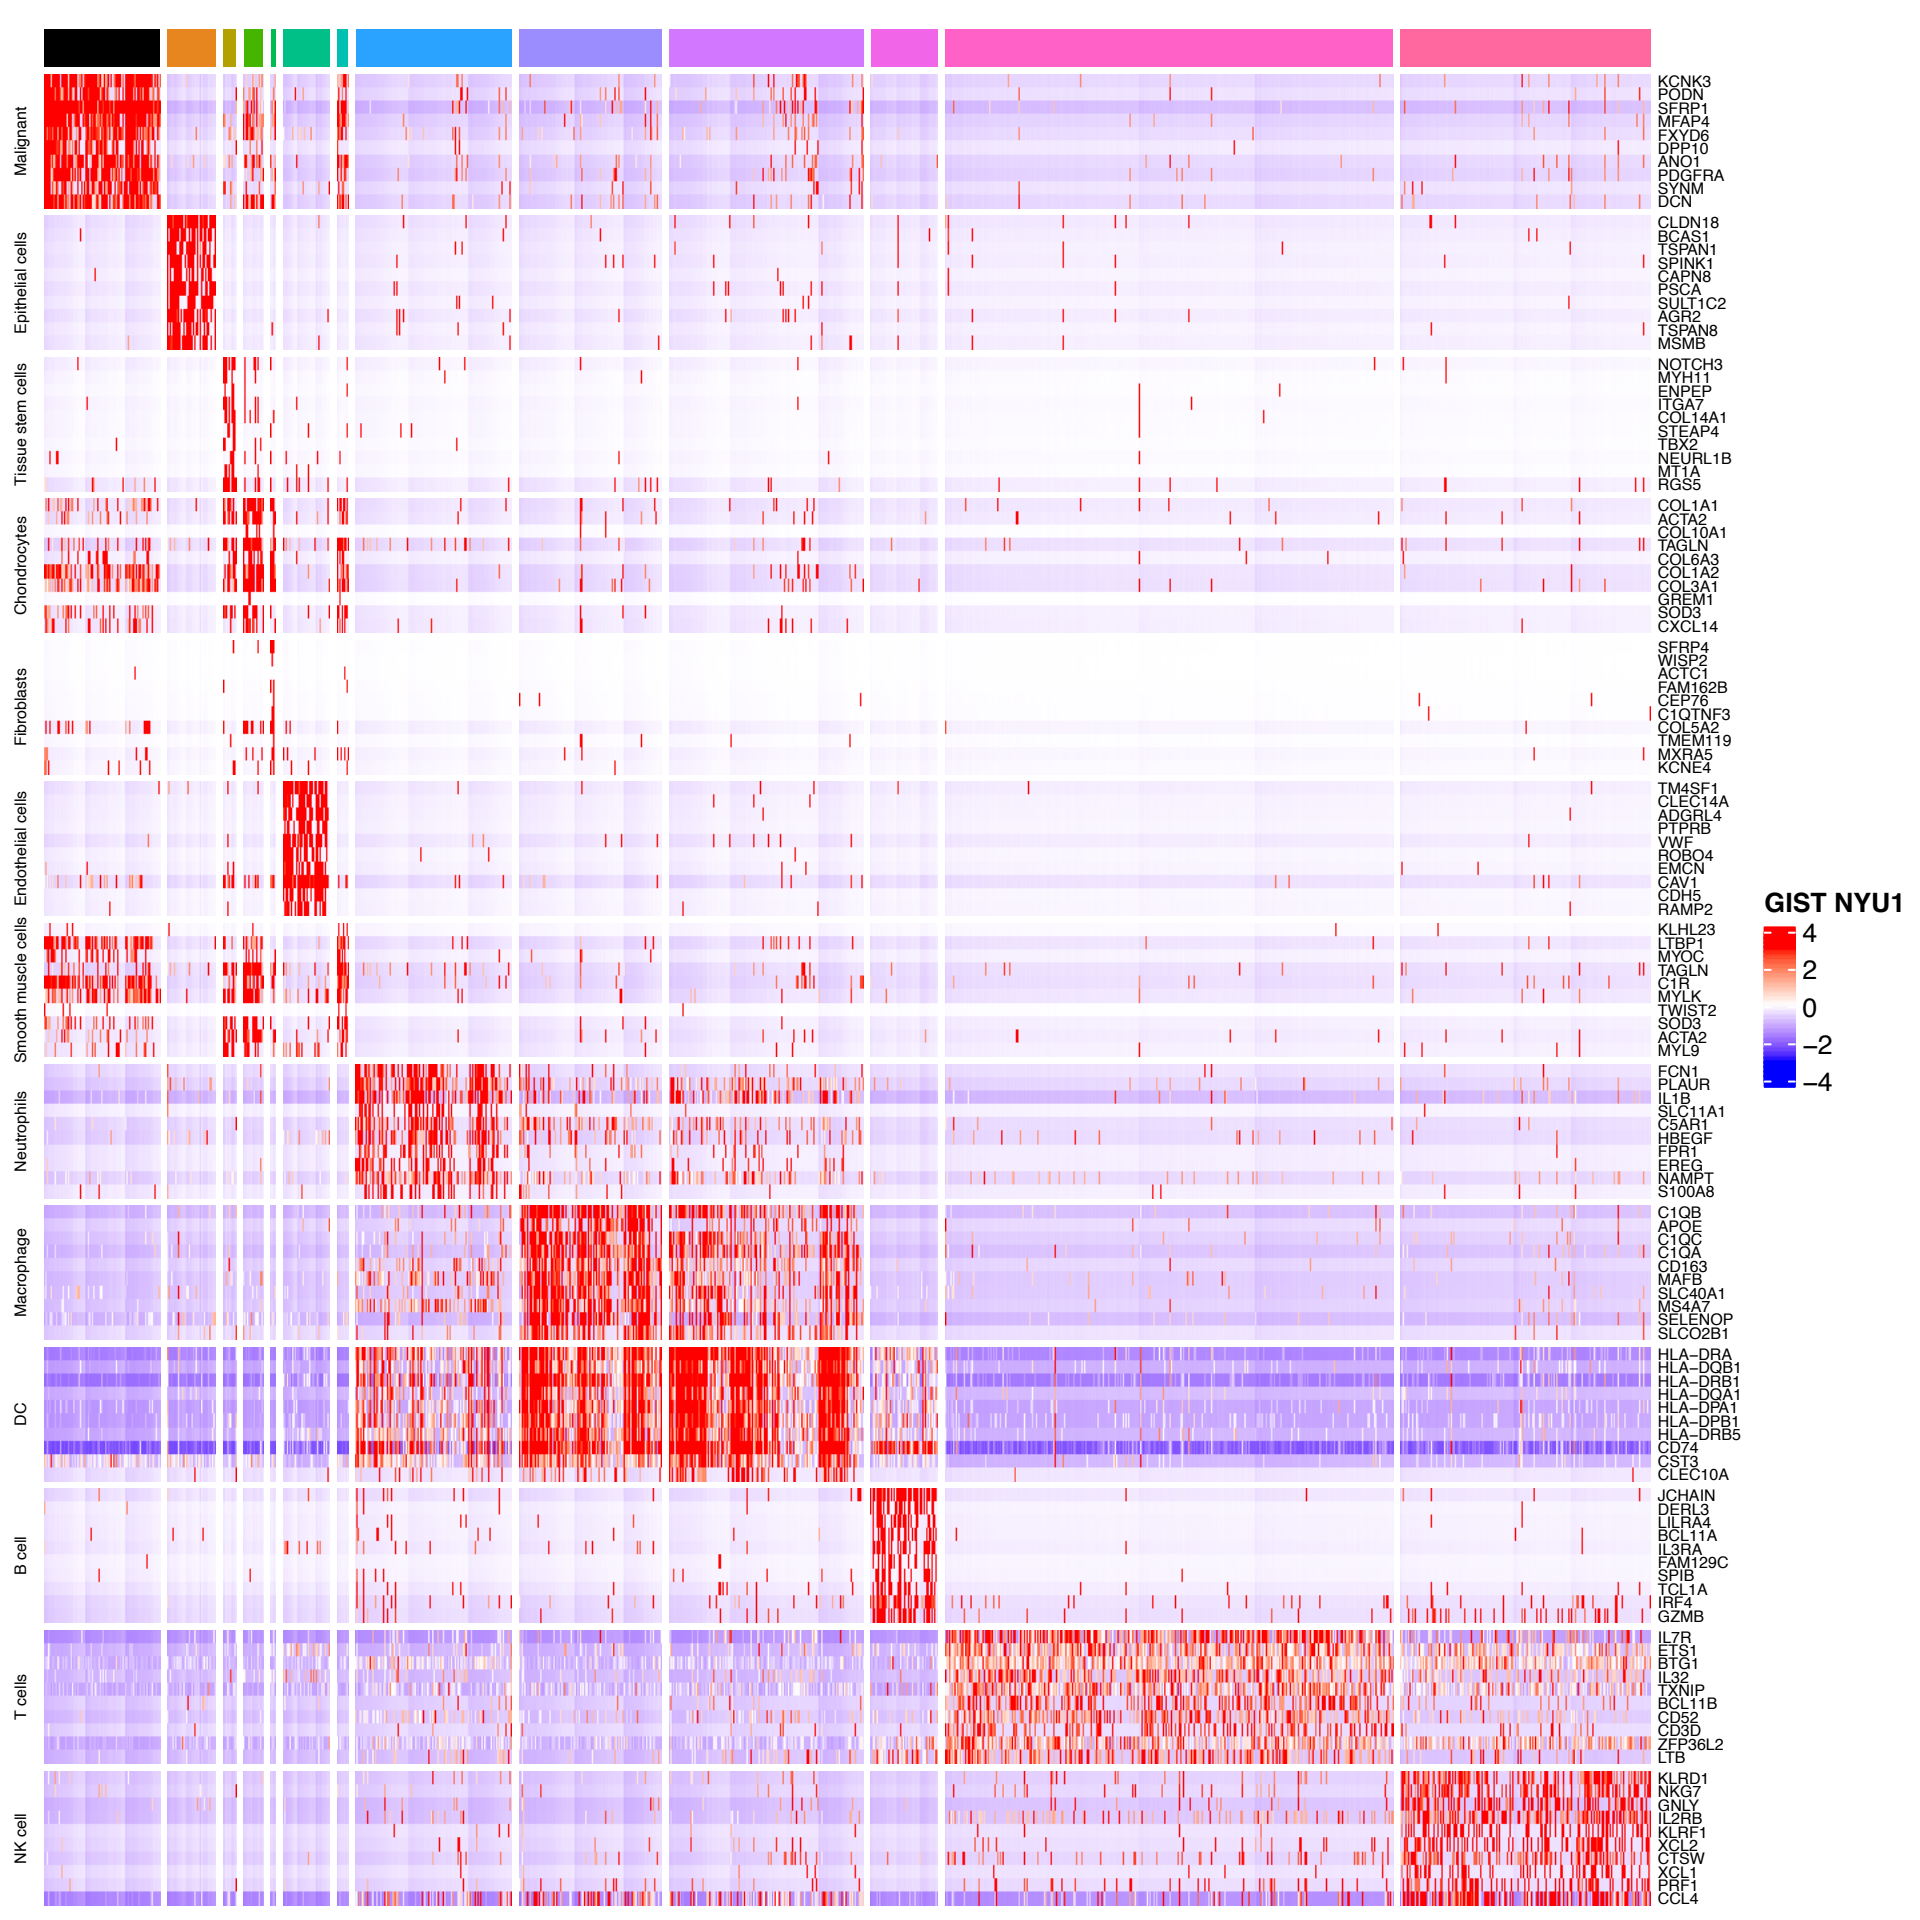

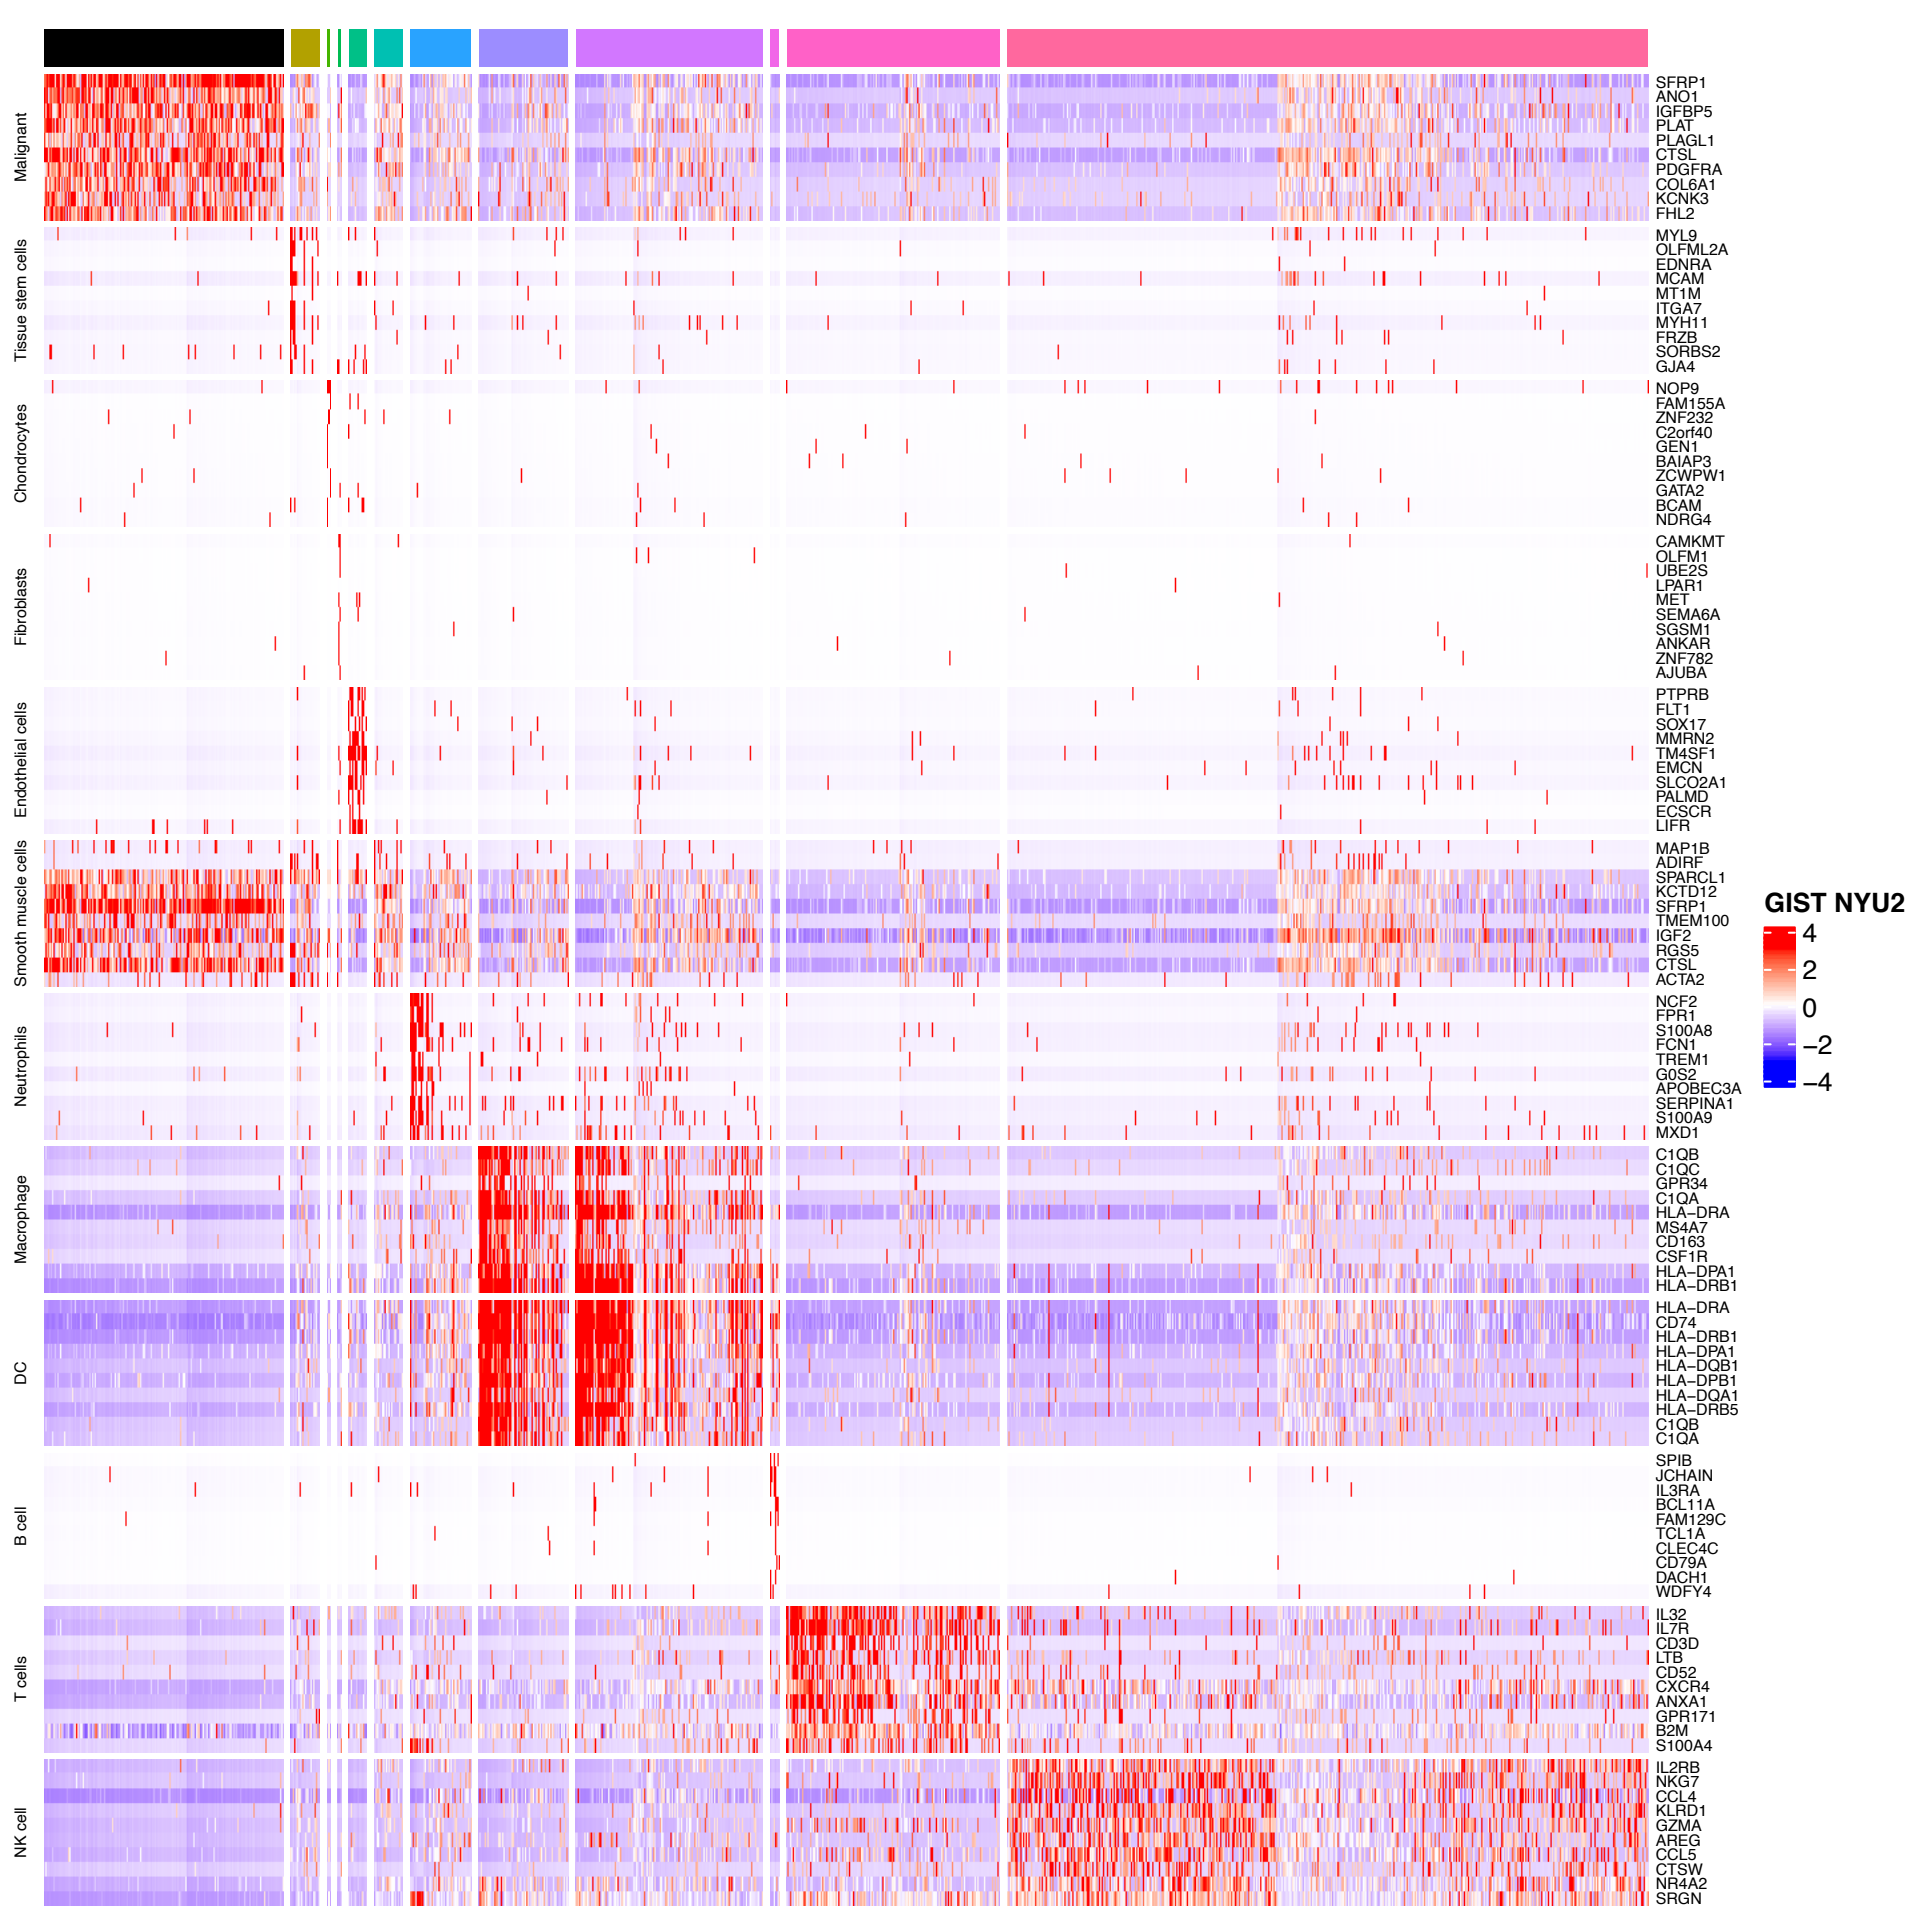

Supplement: NIHMS1857489-supplement-Supplementary_Data_1.pdf [file NIHMS1857489-supplement-Supplementary_Data_1.pdf]
